# 1 Genomic features of asexual animals

2  
3 Kamil S. Jaron<sup>1,2</sup>, Jens Bast<sup>1</sup>, T. Rhyker Ranallo-Benavidez<sup>3</sup>, Marc Robinson-Rechavi<sup>1,2</sup> &  
4 Tanja Schwander<sup>1</sup>

5  
6 <sup>1</sup>Department of Ecology and Evolution, University of Lausanne, Lausanne, Switzerland

7 <sup>2</sup>Swiss Institute of Bioinformatics, Lausanne, Switzerland

8 <sup>3</sup>Department of Biomedical Engineering, Johns Hopkins University, Baltimore, MD, USA

9  
10 **Corresponding Author:** Correspondence to Kamil S. Jaron ([kamiljaron@gmail.com](mailto:kamiljaron@gmail.com))

11 **Data Availability:** The code of the pipeline for gathering data, calculating and plotting  
12 results is available at <https://github.com/KamilSJaron/genomic-features-of-aseexual-animals>;  
13 the majority of sequencing reads are available in public databases under the accessions  
14 listed in **Supplementary Table 1**. The data without publicly available sequencing reads were  
15 obtained via personal communication with the corresponding authors.

16 **Abbreviations:** TE, transposable element; HGT, horizontal gene transfer

## 17 Abstract

18 Evolution under asexuality is predicted to impact genomes in numerous ways, but empirical  
19 evidence remains unclear. Case studies of individual asexual animals have reported peculiar  
20 genomic features which have been linked to asexuality, including high heterozygosity, a high  
21 abundance of horizontally acquired genes, a low transposable element load, and the  
22 presence of palindromes. However, it is unclear whether these features are lineage-specific  
23 or general consequences of asexuality. We reanalyzed published genomes of 24 asexual  
24 animals and found that not a single genome feature is systematically replicated across a  
25 majority of these species, suggesting that there is no genomic feature characteristic of  
26 asexuality. We found that only asexuals of hybrid origin were characterized by high  
27 heterozygosity levels. Asexuals that were not of hybrid origin appeared to be largely  
28 homozygous, independently of the cellular mechanism underlying asexuality. Overall,  
29 despite the importance of recombination rate variation for understanding the evolution of  
30 sexual animal genomes, the genome-wide absence of recombination does not appear to  
31 have the dramatic effects which are expected from classical theoretical models. The reasons  
32 for this are probably a combination of lineage-specific patterns, impact of the origin of  
33 asexuality, and a survivor bias of asexual lineages.

## 34 Introduction

35 Sex: What is it good for? The reasons for why most eukaryotes take a complicated detour to  
36 reproduction, when straightforward options are available, remains a central and largely  
37 unanswered question in evolutionary biology<sup>1,2</sup>. The species that use asexual reproduction  
38 as their sole form of replication typically occur at the tips of phylogenies and only few of them  
39 have succeeded like their sexually reproducing counterparts<sup>3</sup>. In other words, most asexual  
40 lineages may eventually be destined for extinction. These incipient evolutionary failures are  
41 however invaluable because by understanding the evolutionary fate of asexual species,  
42 something may be learned about the adaptive value of sex.

43

44 An accumulating number of studies have sequenced the genomes of asexually reproducing  
45 animals, often with the aim of identifying features that would distinguish them from sexual  
46 species (**Figure 1**). In asexual animals, females produce daughters from unfertilized eggs  
47 via so-called thelytokous parthenogenesis (hereafter asexuality)<sup>4</sup>. Asexuality is predicted to  
48 have many consequences for genome evolution, since gamete production via meiosis and  
49 the restoration of somatic ploidy levels via fertilization no longer take place. Predicted  
50 consequences include for example the accumulation of deleterious mutations<sup>5-7</sup>, as well as  
51 changes in heterozygosity levels<sup>8,9</sup> and transposable element (TE) dynamics<sup>10</sup>. Some  
52 predictions have been tested without genomic data, using a handful of housekeeping genes.  
53 However, conclusions based on such small and non-random subsets of genomes can lead  
54 to erroneous conclusions<sup>11</sup>. With the advent of high-throughput sequencing it is possible to  
55 evaluate classical predictions of asexuality at the genome scale, and furthermore to test new  
56 predictions, such as the accumulation of palindromes (see below), which could not be  
57 studied with single gene approaches. In the present study, we compare the published  
58 genomes of 24 asexual animal species (**Figure 1**) to assess whether we can identify any key  
59 features characteristic of asexual animals. The 24 species comprise four species of bdelloid  
60 rotifers, a group that likely persisted and diversified in the absence of canonical sex for over  
61 40 million years<sup>12</sup>. Bdelloids have thus far overcome the predicted dead-end fate of  
62 asexuality, which raises the question of what mechanisms protect them from extinction, and  
63 whether these mechanisms are visible in specific characteristics of their genomes.

64

65 Because the predicted consequences of asexuality are strongly affected by how asexuality  
66 evolved from the sexual ancestor (**Box 1**) as well as by the cellular mechanisms underlying  
67 asexuality (**Box 2**), we include biological differences among asexual species in our  
68 comparisons. For example, some asexual species have evolved via hybridization (**Box 1**),  
69 which generates high heterozygosity and can result in increased activity of transposable

70 elements<sup>13–15</sup>. In such instances, it can be difficult to disentangle consequences of  
 71 hybridization from consequences of asexuality. Similarly, some cellular mechanisms  
 72 underlying asexuality involve meiotic divisions, with a secondary restoration of somatic  
 73 ploidy levels, while others do not. In the former case, heterozygosity in the asexual species  
 74 is expected to decay rapidly, while in the latter case, it could be maintained or even increase  
 75 over time (**Box 2**). Finally, because genome studies differed in their focus and in the  
 76 methods used, we reanalyzed published genomes with standardized approaches. Whenever  
 77 possible, we conducted quantitative comparisons between groups of asexual species.  
 78 However, for interpretation, it is important to consider that the available genomes are not a  
 79 random nor representative sample of asexual animals, and that not all of these genomes  
 80 reflect evolutionarily independent events.

81  
 82 We uncovered a number of unusual features in the genomes of asexual animals, including  
 83 extreme loads of transposable elements and highly asymmetric divergence among  
 84 haplotypes in polyploid species of hybrid origin. However, none of these were systematically  
 85 replicated across even a majority of analyzed species, let alone all of them, suggesting that  
 86 there is no universal genomic feature specific to asexual species. We found that a hybrid  
 87 origin of asexuality was the most important factor affecting heterozygosity, with potential  
 88 effects of asexuality being masked by effects of hybrid ancestry. Unexpectedly, asexuals  
 89 that are not of hybrid origin are largely homozygous, independently of the cellular  
 90 mechanism underlying asexuality.

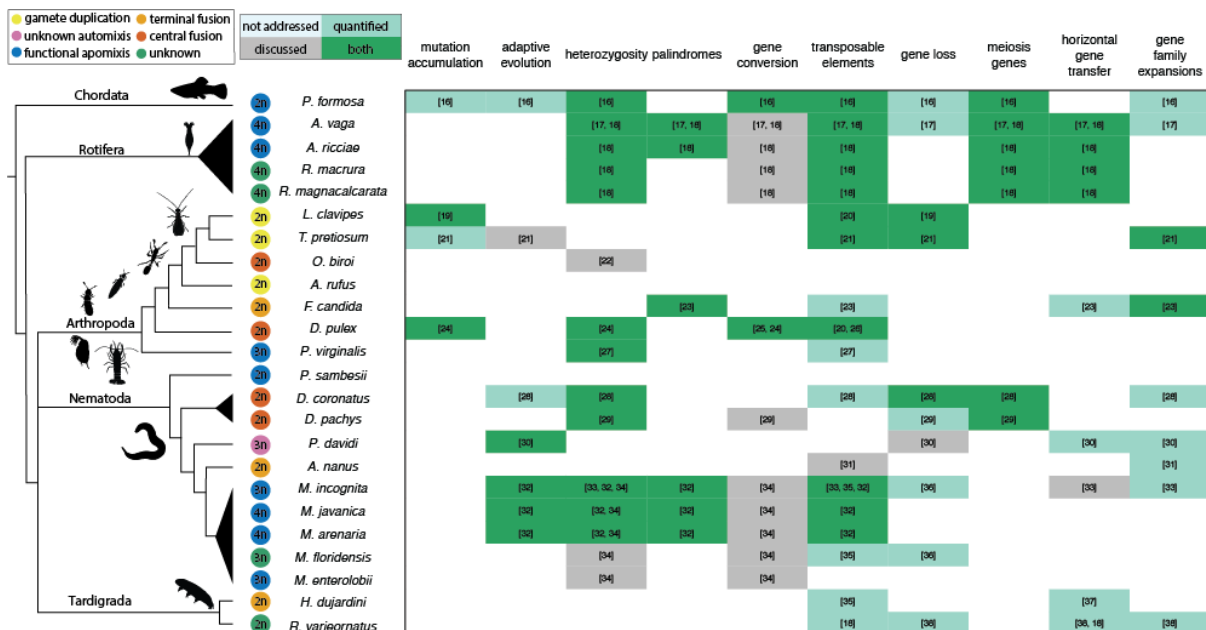

91  
 92 **Figure 1: Genome features studied in asexual animal species.** The phylogeny displays  
 93 the taxonomic relation of the 24 sequenced asexual animal species considered here. The  
 94 color of the circle indicates the cellular mechanism of asexuality and the number inside the

95 circle the ploidy of the species (see Supplemental Table 1 for details). Note that *M.*  
96 *floridensis* is considered 2n in the published genome studies but our analyses clearly show  
97 that this species is triploid (Supplementary Materials). The 24 species correspond to at least  
98 16 independent transitions from sexual to asexual reproduction; species that might derive  
99 from the same original transition are grouped in triangles. Each original genome article  
100 explored a given set of genome features: the green cells (both light and dark) represent  
101 cases where the genomic feature was quantified; the dark cells (grey, dark green) represent  
102 studies where the genomic features were discussed with respect to asexuality.  
103 Heterozygosity, palindromes and transposable elements were reanalysed in this study, the  
104 discussion of the remaining features is based on the analyses reported in the individual  
105 genome studies<sup>16–38</sup>.

106

### 107 **Box 1: Transitions to asexuality**

108 Meiotic sex evolved once ~1.5 billion years ago, and since then remained the predominant  
109 mode of reproduction in eukaryotes<sup>3,39</sup>. Current asexual animals therefore derive from a  
110 sexual ancestor, but how transitions from sexual to asexual reproduction occur can vary.  
111 While the molecular changes underlying different types of transitions are unknown, the  
112 expected genomic consequences of asexuality vary extensively among them<sup>14</sup>.

113 **Hybrid origin.** Hybridization between sexual species can generate hybrid females that  
114 reproduce asexually<sup>14,40</sup>. Asexuality caused by hybridization generates high levels of  
115 heterozygosity, corresponding to the divergence between the parental sexual species prior  
116 to hybridization. Hybridization can also result in a burst of transposable element activity<sup>13</sup>.

117 **Endosymbiont infection.** Infection with intracellular endosymbionts (such as *Wolbachia*,  
118 *Cardinium* or *Rickettsia*) can cause asexuality, a pattern that frequent in species with  
119 haplodiploid sex determination<sup>41</sup>. This type of transition often (but not always) results in fully  
120 homozygous lineages because asexuality induction frequently occurs via gamete duplication  
121 (see Box 2).

122 **Spontaneous mutations/Contagious asexuality.** Spontaneous mutations can also  
123 underlie transitions from sexual to asexual reproduction. In addition, asexual females of  
124 some species produce males that mate with females of sexual lineages, and thereby  
125 generate new asexual strains (contagious asexuality). In both cases, the genomes of  
126 incipient asexual lineages are expected to be very similar to those of their sexual relatives  
127 and subsequent changes should be largely driven by the cellular mechanism underlying  
128 asexuality (Box 2).

129

### 130 **Box 2: Cellular mechanisms of asexuality**

131 In sexual species offspring is generated through the fusion of male and female gametes. In  
132 asexuals, females generate diploid (or polyploid) offspring from unfertilized oocytes via  
133 different cellular mechanisms. The cellular mechanism used is predicted to affect genome  
134 evolution and especially heterozygosity levels. For details see <sup>4,42</sup>.

135 **Mitotic asexuality** (Apomixis). Under mitotic asexuality, no ploidy reduction occurs and  
136 offspring are clones of their mother.

137 **Meiotic asexuality** (Automixis). Under meiotic asexuality, meiotic divisions occur partially or  
138 completely, but somatic ploidy levels are maintained via different mechanisms. Some of  
139 these mechanisms have similar genomic consequences as mitotic asexuality, even though  
140 meiosis is involved (for example, endoduplication in hybrid asexuals results in offspring that  
141 are clones of their mother. Such mechanisms are often referred to as “functionally mitotic”  
142 (or functionally apomictic), especially when the cellular mechanisms are not known in detail  
143 but genotyping data suggest that offspring are clones of their mother.

144 **Endoduplication**. A duplication of the entire chromosome set occurs before normal  
145 meiosis, during which ploidy is reduced again. If recombination occurs between  
146 identical chromosome copies rather than between chromosome homologs,  
147 endoduplication produces offspring that are clones of their mother.

148 **Inverted meiosis with terminal fusion** (gonoid thelytoky). During the first meiotic  
149 division, sister chromatids separate instead of homologous chromosomes. The  
150 homologues are separated in the second meiotic division. In the absence of  
151 recombination, inverted meiosis with terminal fusion generates offspring that are  
152 clones of their mother (and though mechanistically different, is conceptually  
153 equivalent to central fusion without recombination). Holocentric chromosomes seem  
154 to be a prerequisite for this type of mechanism <sup>43,44</sup>.

155 **Central fusion and terminal fusion**. Under these two mechanisms, somatic ploidy  
156 levels are restored through the fusion of two of the four meiotic products (products  
157 separated during the first meiotic division merge under central fusion, products  
158 separated during the second division merge under terminal fusion). In the absence of  
159 recombination, central fusion generates offspring that are clones of their mother.

160 **Gamete duplication**. After a full meiosis, a haploid meiotic product undergoes  
161 duplication. This results in a diploid, but fully homozygous offspring.

## 162 Results

### 163 Overview of species and genomes studied

164 We reanalyzed the published genomes of 24 asexual animal species with the aim of  
165 identifying general genomic signatures of asexuality. The 24 species correspond to at least  
166 16 independent transitions to asexuality and cover a broad taxonomic range, including  
167 chordates, rotifers, arthropods, nematodes and tardigrades. In addition to covering this  
168 taxonomic range, the asexual species vary in the cellular mechanisms underlying asexuality,  
169 in the mechanisms that caused the transition to asexuality, as well as in other biological  
170 aspects (**Figure 1, Supplementary Tables 1 & 2**). This variation allows us to assess  
171 whether asexuality generates universal genomic signatures independently of species-  
172 specific traits.

173

174 The cellular mechanisms underlying asexuality were studied in 20 of the 24 species. Eight of  
175 them use mitotic asexuality, while the 12 remaining species use different types of meiotic  
176 asexuality (**Figure 1**). All but one of the eight species with mitotic asexuality are polyploid,  
177 the amazon molly *P. formosa* being the only diploid studied. Conversely, all but one species  
178 with meiotic asexuality are diploid. This is expected given that polyploidy can generate  
179 problems during meiosis (reviewed in <sup>45</sup>). Nevertheless, the nematode *Panagrolaimus sp.* is  
180 characterized by both meiotic asexuality and triploidy <sup>30</sup> (see **Supplementary Table 1** for  
181 details).

182

183 Information on how asexuality evolved is available for 15 of the 24 sequenced species  
184 (Figure 1). A hybrid origin has been suggested for ten of these. Endosymbionts are the most  
185 likely cause of asexuality in four species (the springtail, both wasps and the thrips), and  
186 spontaneous mutation in one (the ant). Across the 24 species, hybrid origin is correlated with  
187 polyploidy. Six of the 11 polyploids in our sample are of hybrid origin, while for the five others  
188 a hybrid origin has thus far not been suggested, but is supported by our results (see below).  
189 It is important to note however that there are many polyploid asexual animals that are not of  
190 hybrid origin, including several well studied asexual species such as the New Zealand  
191 mudsnail *Potamopyrgus antipodarum*, the bush cricket *Saga pedo*, or the bagworm moth  
192 *Dahlica triquetrella*. None of these has a published genome yet which precludes their  
193 inclusion in our study.

194

195 Most if not all predicted consequences of asexuality are expected to accumulate over time,  
196 meaning that their effect size as well as the power to detect them increases in old asexual

197 lineages. However, estimating the age of asexual lineages is difficult and always associated  
198 with large uncertainties<sup>46,47</sup>. We therefore did not include quantitative comparisons among  
199 asexuals with respect to their age. However, because our set of species comprises asexuals  
200 believed to be ‘ancient’ (i.e., several million years old, see **Supplementary Table 1**), we  
201 discuss, where appropriate, potential age effects in a qualitative manner.

## 202 Mutation accumulation and positive selection

203 One of the classical predictions linked to asexuality is that it reduces the efficacy of selection  
204 <sup>5-7,48-50</sup>. This reduction occurs because linkage among loci in asexual species prevents  
205 selection from acting individually on each locus. This can allow for deleterious mutations to  
206 accumulate over time, because they are linked to other sites under selection. It can also  
207 reduce the rate of adaptation, because beneficial mutations cannot reach fixation in a  
208 population as easily as under sexual reproduction.

209

210 The prediction that deleterious mutations accumulate more rapidly in asexual than sexual  
211 lineages has been tested in over twenty groups of different asexual species (reviewed in<sup>51</sup>  
212 and with three additional studies published since<sup>16,21,52</sup>), with results generally supporting  
213 the prediction. However, in only eight studies were the tests conducted genome wide, while  
214 tests in the remaining studies were based on one or a few genes only. Note that four<sup>11,52-54</sup>  
215 of these studies were based on transcriptomes and are therefore not included in our  
216 systematic reanalysis. Among the genome wide tests, results are much more mixed than  
217 among the ‘single or few genes’ studies, raising the question whether the latter are  
218 representative of the genome as a whole. Specifically, only two of the eight genome-wide  
219 studies found support for deleterious mutation accumulation in asexuals<sup>52,53</sup>. However, two  
220 studies found that *sexual* taxa experienced more deleterious mutation accumulation than  
221 asexual taxa<sup>11,19</sup> while the four remaining ones found no differences between sexual and  
222 asexual taxa<sup>16,21,24,54</sup>. In the case of the water flea *D. pulex*, the study specifically reported  
223 that earlier inferences of deleterious mutation accumulation under asexuality were incorrect,  
224 as the detected deleterious mutations in asexual strains were inherited from the sexual  
225 ancestor and did not accumulate after the transition to asexuality<sup>24</sup>.

226

227 In summary, results from genome-wide studies addressing the prediction of deleterious  
228 mutation accumulation in asexual species are equivocal. More studies are therefore needed.  
229 A major constraint for studying deleterious mutation accumulation, and the reason why it  
230 was not studied in most genome studies of asexuals species (**Figure 1**), is that it requires  
231 sexual references for comparison. Such references are either unknown or not included in  
232 most published genome studies of asexuals.

233

234 The same constraints likely explain why no study has thus far addressed adaptive evolution  
235 in the genome of an asexual species. The question of adaptive evolution was addressed  
236 indirectly in the amazon molly, by studying the amount of segregating variation at immune  
237 genes (where variation is known to be beneficial). The authors found very high diversities at  
238 immune genes<sup>16</sup>. However, these were difficult to interpret because standing variation was  
239 not compared to sexual relatives, and because the amazon molly is a hybrid species. Hence  
240 the high diversity could be a consequence of the hybrid origin rather than of asexuality.

## 241 Heterozygosity

242 Expected heterozygosity levels in asexual organisms are influenced by three major factors:  
243 (1) the mechanism of transition to asexuality (which determines the initial level of  
244 heterozygosity) (**Box 1**), (2) the cellular mechanism underlying asexuality (which determines  
245 whether heterozygosity should increase or decrease over time) (**Box 2**), and (3) for how long  
246 a species has been reproducing asexually (because effects of asexuality accumulate over  
247 time).

248

249 As expected, all of the asexual species with a known hybrid origin display high  
250 heterozygosity levels (1.73% - 8.5%, **Figure 2**), while the species with an intraspecific origin  
251 of asexuality show low heterozygosity levels (0.03% - 0.53%, **Figure 2**). However, it is  
252 important to note that hybrid origin is correlated with polyploidy in our dataset, and that  
253 heterozygosity does not have a clear definition in polyploids (**Box 3**). Our measures of  
254 heterozygosity are based on the proportion of sites with more than one allele present among  
255 all copies, where the total number of copies includes all homologous genome regions (**Box**  
256 **3**).

257

258 The heterozygosity levels present at the inception of asexuality should decay over time for  
259 most forms of meiotic asexuality<sup>42,55</sup>. Under mitotic asexuality, heterozygosity is expected to  
260 increase over time as haplotypes can accumulate mutations independently of each other  
261 (generating the so-called 'Meselson effect')<sup>8</sup>. However, gene conversion can strongly reduce  
262 haplotype divergence and, if high enough, can even result in a net loss of heterozygosity  
263 over time, even under mitotic asexuality<sup>8,17</sup>. In spite of the prediction that the cellular  
264 mechanism of asexuality should affect heterozygosity, the cellular mechanism of asexuality  
265 appears to have little or no effect on heterozygosity levels once we control for the effect of  
266 hybrid origins (**Figure 2**). However, we have very little power to detect such effects,  
267 especially because our dataset does not include any asexual species that uses mitotic  
268 asexuality but is not of hybrid origin. Nevertheless, it is interesting to note that species with



269 different forms of meiotic asexuality (including gamete duplication and central fusion) feature  
 270 similarly low heterozygosity levels. This suggests that although the rate of heterozygosity  
 271 loss is expected to vary according to mechanisms of asexuality, this variation is only relevant  
 272 very recently after transitions to asexuality, and no longer affects heterozygosity among  
 273 established asexual species. Alternatively, variation in heterozygosity caused by different  
 274 forms of meiotic asexuality may be too small to be picked up with our methods.

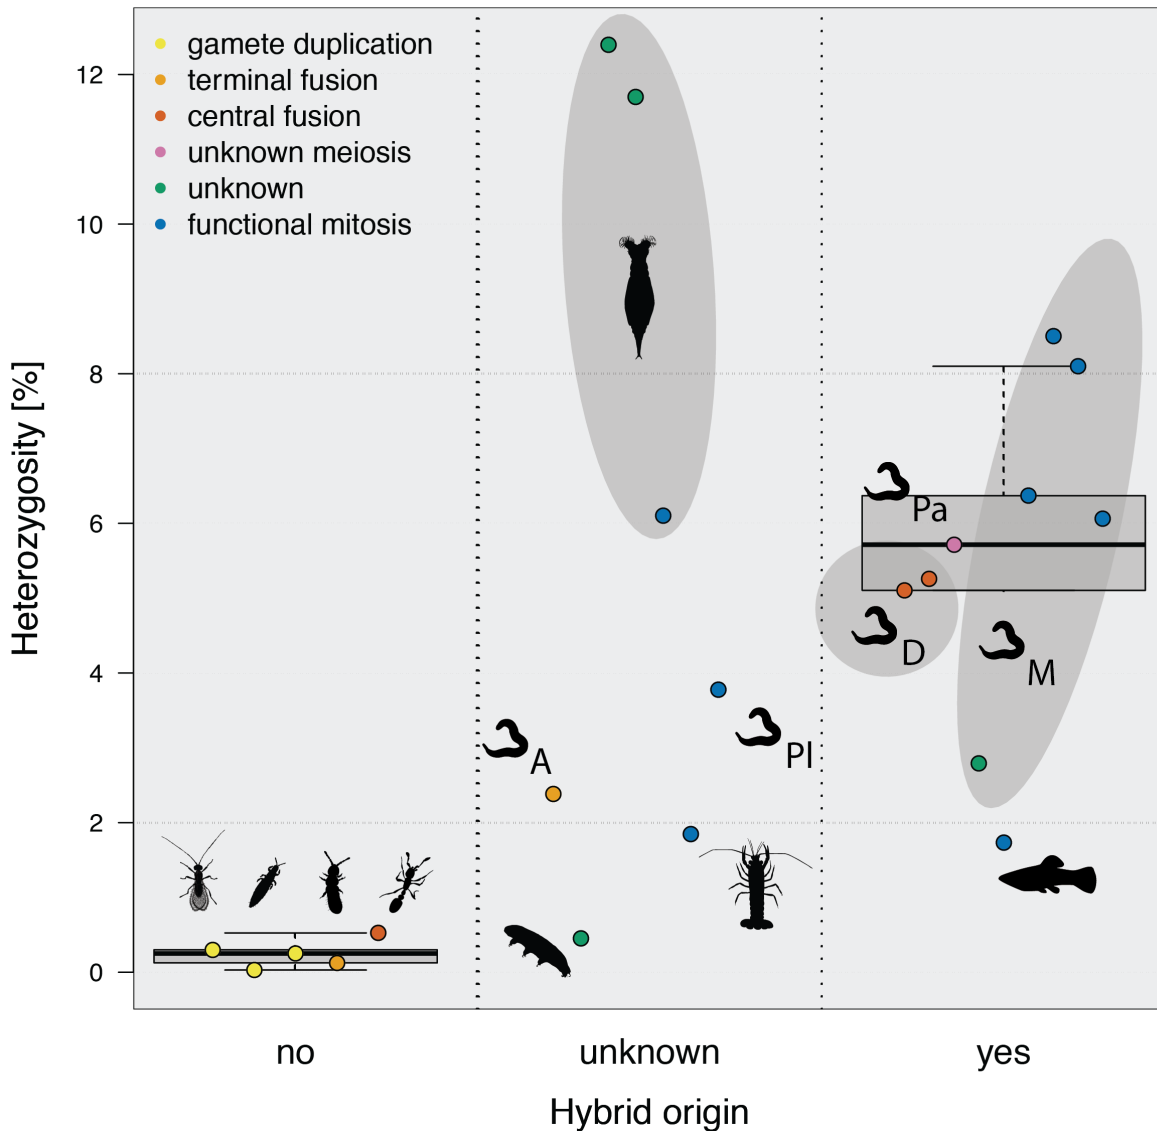

275  
 276 **Figure 2: Hybrid origin is the main driver of high heterozygosity in asexual species.**  
 277 Heterozygosity estimates with respect to hybrid origin (x axis) and cellular mechanism of  
 278 asexuality (color code). Species with a possible shared origin of asexuality are grouped in  
 279 gray ellipses. Nematode genus abbreviations: PI: *Plectus*, D: *Diploscapter* Pa:  
 280 *Panagolaimus*, A: *Acrobelloides*, M: *Meloidogyne*. We were unable to generate  
 281 heterozygosity estimates for three of the 24 asexual species for different reasons: in the

282 tardigrade *H. dujardini* because of extensive contamination in the sequencing reads, in the  
283 water flea *Daphnia pulex* samples because of too low coverage, and in the rotifer *A. vaga*  
284 because of divergence levels that exceed the range quantifiable with the applied methods  
285 (see **Methods** and **Figure 3**). Heterozygosity is significantly higher in the eight asexuals of  
286 confirmed hybrid origin relative to the five that are not (Mann–Whitney U test; p-value =  
287 0.0009).

288

### 289 **Box 3: Quantification of heterozygosity for different ploidy levels**

290 The classical definition of heterozygosity describes heterozygosity as a measure of allelic  
291 divergence, where alleles are defined through chromosome pairing<sup>56</sup>. This definition poses  
292 a problem for genomes where chromosome pairing is not known (e.g., in polyploid  
293 genomes), as well as for genomes of mitotic asexuals where chromosome pairing may not  
294 occur at all. In these cases, concepts such as divergence between alleles (i.e.,  
295 heterozygosity) vs. divergence of paralogs, that are clearly distinct in diploids, become  
296 blurred. We therefore quantify heterozygosity as the proportion of nucleotides that differ in at  
297 least one of the homologous chromosomes. Three examples of genomes with similar  
298 heterozygosity but different ploidy levels are shown on the scheme for illustration. Grey bars  
299 highlight specific loci, coloured bars represent alternative alleles at a given locus.

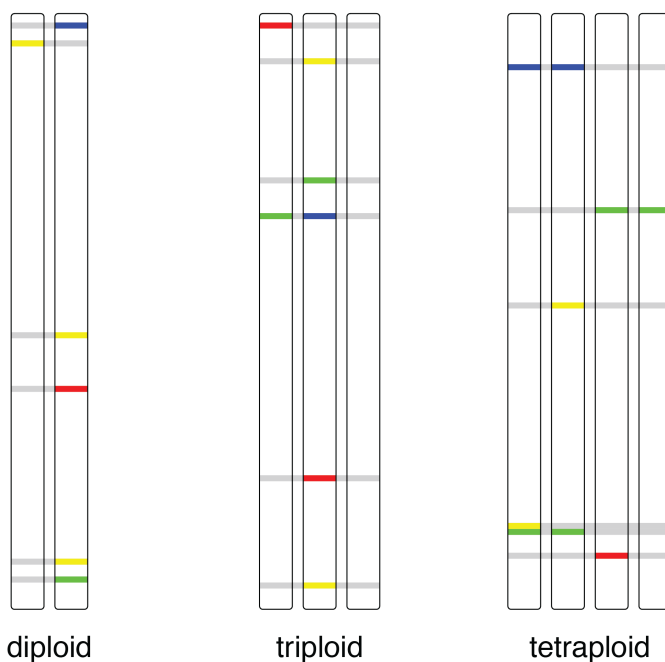

300

## 301 Heterozygosity structure in polyploids

302 Heterozygosity in polyploids is estimated via the proportion of sites that differ in at least one  
303 of the homologous regions (see **Box 3**). This means that the estimated genome-wide  
304 heterozygosity could be generated by a single haplotype that is highly divergent while others  
305 are similar, or by homogeneous divergence across all copies present, or a combination of  
306 these. We therefore decomposed genome-wide heterozygosity for each polyploid genome  
307 into portions with different divergence structures (**Figure 3**).

308

309 In polyploid species of hybrid origin (sexual or asexual), heterozygosity is generally driven by  
310 divergence between haplotypes originating from different species (hereafter homoeologs,  
311 following the terminology of Glover et al <sup>57</sup>). In our dataset, the polyploid species with  
312 confirmed hybrid origins are nematodes in the genera *Meloidogyne* (five species) and  
313 *Panagrolaimus* (one). As expected, heterozygosity in these species is largely dominated by  
314 divergence between homoeologs. In the triploid species, divergence is between a single  
315 homoeolog and two similar homologs (yellow portions in **Figure 3**), consistent with previous  
316 findings <sup>30,34</sup>. In the tetraploid species, genome-wide heterozygosity is generated by a  
317 combination of genome portions comprised of one homoeolog and three similar homologs  
318 and of other portions comprised of pairs of homoeologs (pink portions in **Figure 3**).

319

320 Given that in asexual polyploids of hybrid origin we expect and observe highly  
321 heterogeneous divergences among haplotypes, while polyploidy of intra-specific origin is  
322 predicted to generate homogeneous divergences, haplotype divergences can be used to  
323 infer the origin of asexuality in polyploid species. Notably, the highly asymmetric divergence  
324 levels between haplotypes in the four bdelloid rotifers (**Figure 3**) are best explained by a  
325 hybrid origin of bdelloids. When tetraploidy was first discovered in bdelloids, it was proposed  
326 that tetraploidy stemmed from either a whole genome duplication or a hybridization event in  
327 their ancestor <sup>58</sup>. However, studies of bdelloid rotifers traditionally refer to the divergent  
328 haplotypes as “ohnologs” (e.g., <sup>17,18</sup>), which, following the unified vocabulary of Glover et al <sup>57</sup>  
329 would imply that the diverged haplotypes are products of a whole genome duplication.  
330 However, given their likely hybrid origin, referring to them as homoeologs appears more  
331 appropriate.

332

333 Whether the crayfish is also of hybrid origin remains as an open question. Its genome  
334 features two nearly identical haplotypes and one that is substantially divergent (1.8%, **Figure**  
335 **3**), which is suggestive of a hybrid origin. However, the divergence of the latter is within the

336 range of heterozygosity commonly observed in sexual species, and therefore we cannot  
337 clearly distinguish between an intra-specific or a hybrid origin.

338

339 Our analyses also reveal that the divergence of homologs varies extensively among bdelloid  
340 rotifer genera. Divergence is very low in *Rotaria* (0% in *R. magnacalcarata* and 0.25% *R.*  
341 *macrura*) and low in *A. ricciae* (0.5%) but relatively high in *A. vaga* (2.4%). The mechanisms  
342 causing these differences remain unknown. In *A. vaga* it has been suggested that gene  
343 conversion reduces divergence between homologs in some genome regions<sup>17</sup>. It is possible  
344 that rates of gene conversion are higher in *Rotaria* than *Adineta*, for unknown reasons.  
345 Independently of the mechanisms causing the differences between bdelloid genera and  
346 species, it is important to note that with such low levels of divergence between homologs,  
347 there can be no genome-wide 'Meselson effect' in bdelloid rotifers (see also<sup>17</sup>). It remains  
348 possible that the subset of genomic regions with divergence between homologs in *Adineta*  
349 feature allele phylogenies as expected under the 'Meselson effect'. This is the case in the  
350 asexual unicellular eukaryote *Trypanosoma brucei gambiense*: some genome regions  
351 feature high heterozygosity and allele phylogenies as expected under the 'Meselson effect',  
352 while others are largely homozygous<sup>59</sup>. Again, it remains unknown why there is such  
353 extensive heterogeneity in divergence across the genome in this species. A possible  
354 explanation is that the heterozygous genome regions are the consequence of ancient  
355 introgression, and that gene conversion rates are low in such regions with very high  
356 heterozygosity (see Discussion).

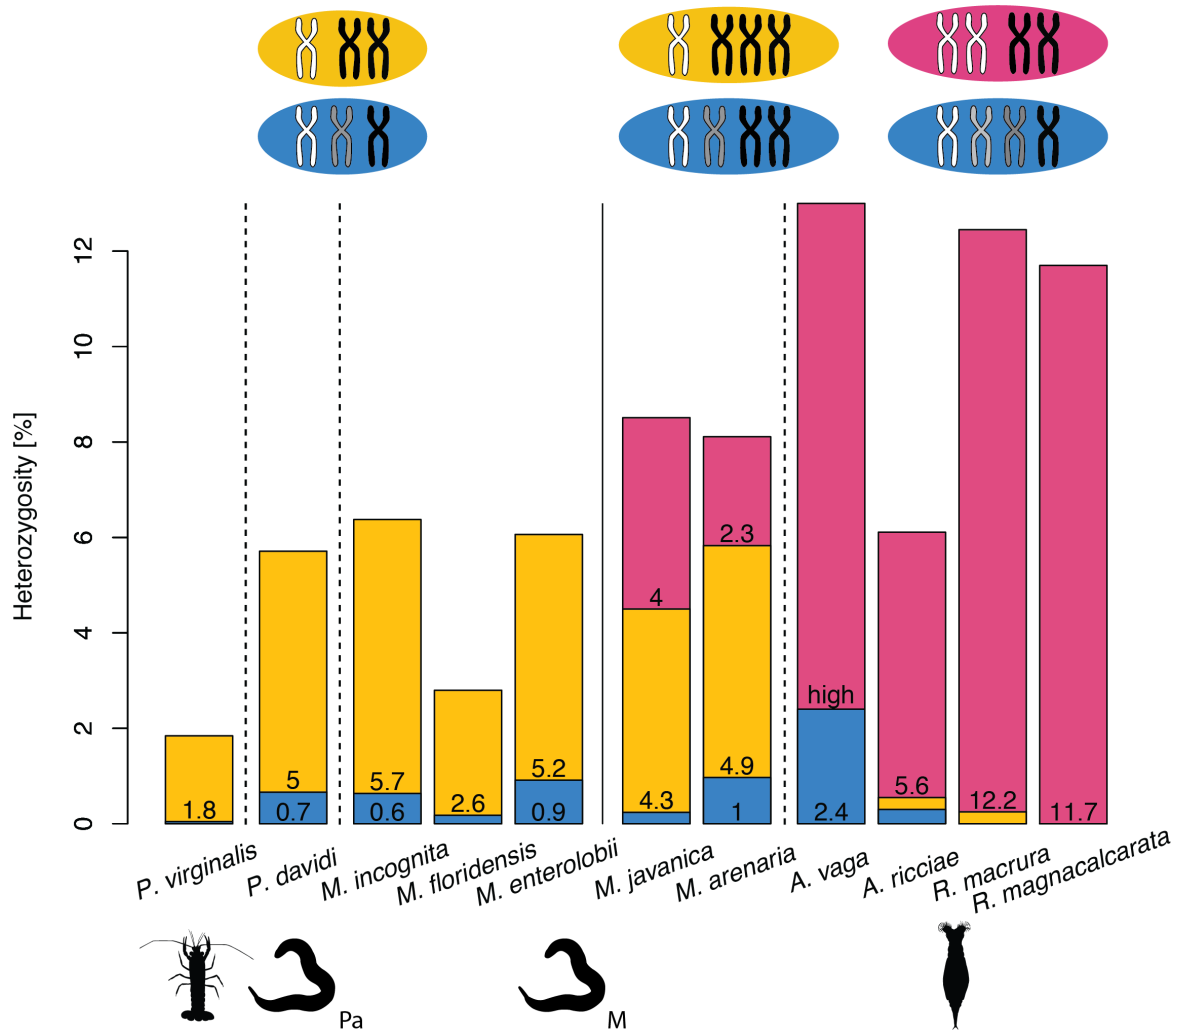

357

358 **Figure 3: Heterozygosity structure in polyploids.** Biallelic loci are indicated in yellow or  
 359 pink, yellow when the alternative allele is carried by a single haplotype (AAB or AAAB), and  
 360 pink when both alleles are represented twice (AABB). Loci with more than two alleles are  
 361 indicated in blue. Note that homoeolog divergence in the rotifer *Adineta vaga* is so extensive  
 362 that it is impossible to estimate the exact divergence level using kmer spectra analysis (see  
 363 Methods for details).

### 364 Palindromes and gene conversion

365 Palindromes are duplicated regions on a single chromosome in reverse orientation. Because  
 366 of their orientation, palindromes can align and form hairpins, which allows for gene  
 367 conversion within duplicated regions (**Supplementary Figure 2**). Palindrome-mediated gene  
 368 conversion was shown to play a major role in limiting the accumulation of deleterious  
 369 mutations for non-recombining human and chimpanzee Y chromosomes<sup>60-62</sup>. Indeed,  
 370 approximately one third of coding genes on these Y chromosomes occur in palindromes,  
 371 and the highly concerted evolution of palindromic regions indicates that the rates of gene  
 372 conversion are at least two orders of magnitude higher in the palindromes than between

373 homologous chromosomes. The reports of palindromes in the genomes of the bdelloid rotifer  
374 *Adineta vaga*<sup>17</sup> and the springtail *Folsomia candida*<sup>23</sup> led to the hypothesis that palindromes  
375 could play a similar role in asexual organisms – reducing deleterious mutation accumulation  
376 in the absence of recombination. However, the potential benefit of palindrome-mediated  
377 gene conversion depends on the portion of genes in palindromic regions<sup>61</sup>. In addition to  
378 identifying palindromes, it is therefore important to also quantify the number of genes  
379 affected by palindrome-mediated gene conversion.

380

381 Methods for palindrome identification depend on genome assemblies (contrary to the other  
382 genome features we re-analysed in our study). Palindromes are less likely to be detected in  
383 highly fragmented assemblies and artificial palindromes can be generated by erroneous  
384 scaffolding (see also<sup>18</sup>). Our analyses and interpretations assume that there are no  
385 systematic scaffolding errors in the published assemblies. Palindrome identification methods  
386 rely on genome annotations, which are available for 22 of the 24 asexual species (all except  
387 *D. pulex* and *A. rufus*). We screened these 22 genomes for the presence of palindromic  
388 arrangements (See **Methods** and **Supplementary Text S2** for details). We identified 19  
389 palindromes in *A. vaga*, 16 in *F. candida*, and up to four palindromes in seven additional  
390 genomes (Table 1). Not a single palindrome was detected in the remaining 13 species. The  
391 frequency of palindromes had no phylogenetic signal; for example, although we found 19  
392 palindromes in *A. vaga*, we found no palindromes in the three other bdelloid rotifers (in  
393 agreement with<sup>18</sup>). There is also no indication for major rearrangements being present  
394 solely in very old asexuals; among the very old asexuals, the non-*A. vaga* rotifers along with  
395 the *Diploscapter* nematodes have either no or only a single palindrome.

396

397 *Adineta vaga* and *F. candida* are the only two species with more than 100 genes potentially  
398 affected by palindrome-mediated gene conversion, but even for these two species, the  
399 overall fraction of genes in palindromes is very small (1.23% and 0.53% respectively). The  
400 fraction of genes in the other seven species ranges between 0.01% and 0.16%, suggesting  
401 that palindromes do not play a major role in the genome evolution of any of the asexual  
402 lineages analyzed. Our findings substantiate the conclusion of a previous study<sup>18</sup> that major  
403 genomic rearrangements and the breaking of gene synteny do not occur at high rates in  
404 asexual organisms. They appear to occur at rates similar to those known in recombining  
405 genome portions of sexual species<sup>63,64</sup>.

406

407 **Table 1: Palindromes in asexual genomes.** Only species with at least one palindrome  
408 detected are listed in the table. Rows in bold highlight species with more than 100 genes  
409 detected in palindromes.

410

| Species                  | Palindromes detected | Potentially affected genes | Fraction of genes [%] |
|--------------------------|----------------------|----------------------------|-----------------------|
| <i>P. formosa</i>        | 1                    | 2                          | 0.01                  |
| <b><i>A. vaga</i></b>    | <b>19*</b>           | <b>636</b>                 | <b>1.29</b>           |
| <i>O. biroi</i>          | 2                    | 6                          | 0.04                  |
| <b><i>F. candida</i></b> | <b>15*</b>           | <b>152</b>                 | <b>0.53</b>           |
| <i>D. pachys</i>         | 1                    | 2                          | 0.01                  |
| <i>M. incognita</i>      | 1                    | 26                         | 0.06                  |
| <i>M. arenaria</i>       | 3                    | 38                         | 0.04                  |
| <i>H. dujardini</i>      | 1                    | 8                          | 0.04                  |
| <i>R. varieornatus</i>   | 4                    | 22                         | 0.16                  |

411

412 \* The detected number of palindromes in these species exceeds the number reported in the  
413 corresponding genome articles (17 in *A. vaga* and 11 in *F. candida*). This is because we  
414 included individual genes in palindromic arrangements, whereas the original genome studies  
415 only included genes if they were in palindromic synteny blocks of at least five genes. See  
416 also **Supplementary Text S2**.

417

418 Mitotic gene conversion can also occur outside of palindromic regions, for example when  
419 double-stranded DNA breaks are repaired using the homologous chromosome as a template  
420 <sup>65,66</sup>. It can, in theory, contribute to the loss of heterozygosity under all forms of asexuality,  
421 but mitotic gene conversion rates have only rarely been studied in asexual species – or  
422 sexual ones for that matter. Gene conversion rates are estimated differently in different  
423 studies and are therefore difficult to compare: in the water flea *D. pulex*, they were estimated  
424 to amount to approximately  $10^{-6}$  locus<sup>-1</sup> generation<sup>-1</sup> <sup>24,25,67</sup>, in the amazon molly *P. formosa*  
425 to  $10^{-8}$  <sup>16</sup>. Up to 11% of the genome of the nematode *D. pachys* <sup>29</sup> is suggested to be  
426 homozygous as a consequence of gene conversion, and studies also argued for an  
427 important role of gene conversion for genome evolution in root knot nematodes <sup>34</sup> and  
428 rotifers <sup>17,18</sup>, although no quantitative estimates are available for these species groups.

## 429 Transposable elements

430 Transposable elements (TEs) are DNA sequences that can autonomously change positions  
431 in a genome via various ‘cut-and-paste’ and ‘copy-and-paste’ mechanisms <sup>68,69</sup>. TEs can  
432 invade genomes even though they generally provide no adaptive advantage to the individual

433 carrying them<sup>70-72</sup>. To the contrary, new TE insertions in coding or regulatory sequences  
434 disrupt gene functions and cause deleterious effects in the host; only very rarely can specific  
435 insertions be co-opted to acquire novel, adaptive, functions for the host<sup>72</sup>. In sexual  
436 organisms, TEs can spread through panmictic populations because of their ability to rapidly  
437 colonize new genomes<sup>10,73</sup>. At the same time, sexual reproduction facilitates the purging of  
438 deleterious TE insertions, because recombination, segregation and genetic exchange  
439 among individuals improve the efficacy of selection<sup>74,75</sup>. In the absence of sex, TEs could  
440 therefore accumulate indefinitely, which led to the prediction that TEs could frequently drive  
441 the extinction of asexual lineages. Only asexual lineages without active TEs, or with efficient  
442 TE suppression mechanisms, would be able to persist over evolutionary times<sup>75</sup>. Consistent  
443 with this view, a study in bdelloid rotifers reported extremely low TE loads<sup>76</sup>. This prompted  
444 the authors to suggest that bdelloid rotifers could have been able to persist in the absence of  
445 sex for over 40 million years thanks to their largely TE-free genomes.

446  
447 Our analysis of asexual animal genomes does not support the view that bdelloid rotifers  
448 have unusually low TE contents. The TE content of bdelloid rotifers (0.8% to 9.1%) is  
449 comparable to other asexual animal taxa (**Figure 4**), all of which are considerably younger  
450 than the bdelloids. Across the 24 genomes, there was large variation in total TE content,  
451 overall ranging from 6.6% to 17.9%, but with one species, the marbled crayfish, reaching  
452 34.7%. Nevertheless, the abundance of TEs in asexual animal genomes appears to be  
453 generally lower than in sexual species, which range typically from 8.5-37.6% (median:  
454 24.3%)<sup>77</sup>. Whether this difference is indeed driven by asexuality remains an open question  
455 as TE loads are known to be highly lineage-specific<sup>20,78</sup>. Furthermore, we annotated TEs in  
456 each genome via homology searches in general databases (see methods). This can result in  
457 an underestimation of TE loads relative to annotations based on species-specific TE  
458 libraries. However, this is unlikely to be of major concern in our study since the methods we  
459 used allowed us to identify more TEs than most of the individual genome studies  
460 (**Supplementary Table 3**). Specifically, most studies estimate TE loads from genome  
461 assemblies, which underestimates TE loads because regions with high repetitive contents  
462 are generally not assembled.

463  
464 In addition to other lineage-specific characteristics, the cellular mechanisms underlying  
465 asexuality could also affect TE loads. For example, most forms of meiotic asexuality can  
466 allow for the purging of heterozygous TE-insertions, given the loss of heterozygosity  
467 between generations (**Box 2**). Barring potential gene conversion events, this form of purging  
468 cannot occur under mitotic asexuality. However, in the genomes analyzed here, we did not  
469 find any effect of cellular mechanisms on TE loads (**Supplementary Figure 3**), likely



470 because the expected effect of the cellular mechanisms is very small relative to lineage-  
 471 specific mechanisms. Moreover, host TE suppression mechanisms can contribute to the  
 472 inactivation and subsequent degeneration of TE copies over time, independently of the  
 473 cellular mechanism of asexuality<sup>72,79</sup>.

474  
 475 Two asexual animals clearly stand out (**Figure 4**), one for very low TE contents (the rotifer *A.*  
 476 *ricciae*; <1% of the genome) and one for very high contents (the marbled crayfish *P.*  
 477 *virginialis* >34%). There is currently no known mechanism that could help explain why *A.*  
 478 *ricciae* differs so extensively from other bdelloid rotifers. In the case of the marbled crayfish,  
 479 it is unknown whether its extreme repetitive content is a heritage from its sexual ancestor or  
 480 a consequence of a possible hybrid origin with a subsequent burst of TE activity. In the  
 481 absence of information on TE loads in the sexual relative *P. fallax*, these possibilities cannot  
 482 be evaluated. More generally, in most studies quantifying TE contents in asexual species, no  
 483 comparisons to related sexual species are made. In the cases where this was done, no  
 484 differences could be detected<sup>16,20,21,26,35,80</sup>.

485  
 486 Independently of the question of whether asexuality affects genome-level TE loads, our  
 487 dataset allows us to study whether hybrid species have higher TE loads than non-hybrid  
 488 species. Indeed, TE activity in hybrids is expected to be high because of mismatches  
 489 between species-specific TEs and silencing machineries<sup>13,15,81,82</sup>. However, we do not find  
 490 any difference in TE content according to hybrid vs intraspecific origin of asexuals  
 491 (**Supplementary Figure 2**).

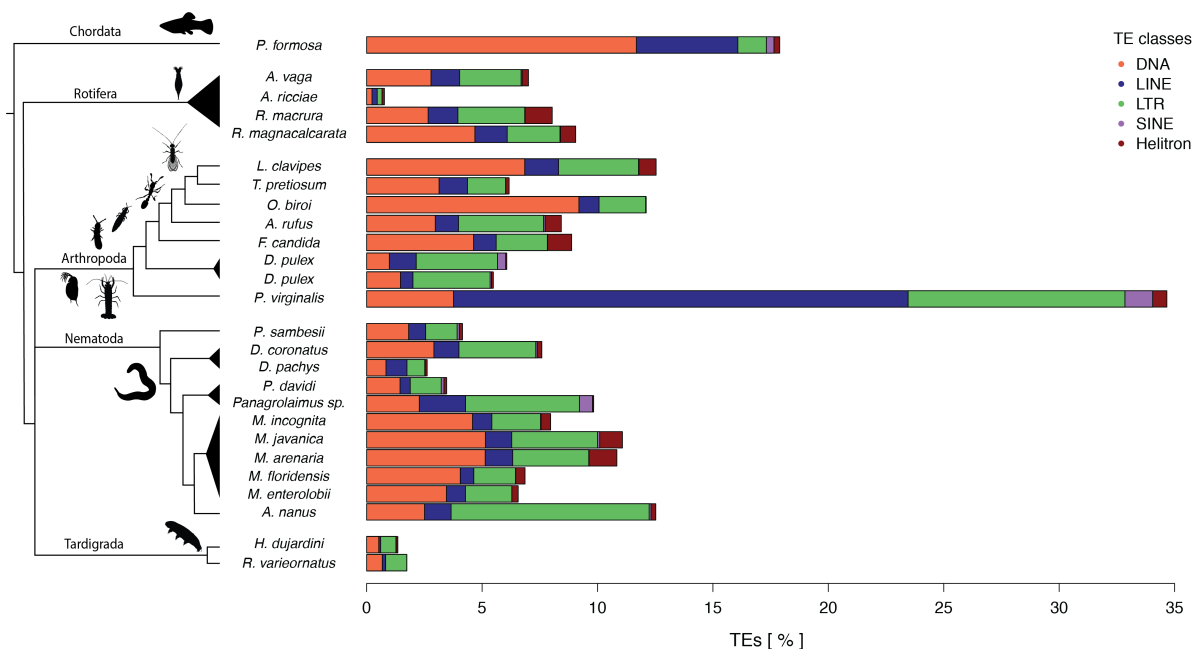

492  
 493 **Figure 4:** Percentage of transposable elements (TEs) in asexual genomes. Both the TE load

494 and frequency of TE classes vary substantially between individual asexual lineages. The TE  
495 classes are: class I “cut-and-paste” DNA transposons (DNA), and class II “copy-and-paste”  
496 long interspersed nuclear elements or autonomous non-LTR elements (LINEs), short  
497 interspersed nuclear elements or non-autonomous non-LTR elements (SINEs), long terminal  
498 repeat elements (LTR), and rolling-circle elements (Helitron).

## 499 Gene loss

500 Asexual animals are predicted to lose genes underlying sexual reproduction traits, including  
501 male-specific traits and functions (e.g. male-specific organs, spermatogenesis), as well as  
502 female traits involved in sexual reproduction (e.g., pheromone production, sperm storage  
503 organs)<sup>83</sup>. In the absence of pleiotropic effects, gene loss is expected due to mutation  
504 accumulation in the absence of purifying selection maintaining sexual traits, as well as to  
505 directional selection to reduce costly sexual traits<sup>84</sup>. Some gene loss consistent with these  
506 predictions is documented. For example, the sex determination genes *xol-1* and *tra-2* are  
507 missing in the nematode *D. coronatus*<sup>28</sup>. Furthermore, genes believed to be involved in  
508 male functions harbour an excess of deleterious mutations in the wasp *Leptopilina clavipes*  
509<sup>19</sup>, which could represent the first step towards the loss of these genes. However, a similar  
510 excess of deleterious mutations in genes with (presumed) male-specific functions was not  
511 detected in the amazon molly *P. formosa*<sup>16</sup>.

512  
513 Species reproducing via mitotic asexuality are further predicted to lose genes specific to  
514 meiotic processes<sup>85</sup>. The genes involved in meiosis have been studied in three of eight  
515 mitotic parthenogens, as well as in *Rotaria* rotifers and *Diploscapter* nematodes, whose  
516 cellular mechanisms of asexuality are unknown. Most meiotic genes have been found in the  
517 four bdelloid rotifers<sup>17,18</sup> and in both species of *Diploscapter* nematodes<sup>28,29</sup>. There was also  
518 no apparent loss of meiosis genes in the amazon molly *P. formosa*<sup>16</sup>. As much as the idea  
519 is appealing, there does not seem to be any support for the predicted loss of meiotic genes  
520 in mitotic asexuals. We note that the lack of our understanding of meiosis on the molecular  
521 level outside of few model organisms (particularly yeast and *C. elegans*) makes the  
522 interpretation of gene loss (or absence thereof) difficult. This is best illustrated by the fact  
523 that losses of meiosis genes have also been reported in different sexual species, where  
524 meiosis is clearly functional<sup>86</sup>.

525  
526 In summary, some gene loss consistent with the loss of different sexual functions has been  
527 reported in several asexual species. However, a clear interpretation of gene loss in asexual  
528 species is problematic because the function of the vast majority of genes is unknown in  
529 these non-model organisms.

## 530 Horizontal gene transfer

531 Asexual species could harbour many genes acquired via horizontal gene transfer (HGT) as a  
532 consequence of relaxed selection on pairing of homologous chromosomes. It has also been  
533 proposed that HGTs represented an adaptive benefit which allows for the long term  
534 maintenance of asexuality<sup>87</sup>. Indeed, bdelloid rotifers have been reported to carry an  
535 unusually large amount (6.2% - 9.1%) of horizontally acquired genes compared to sexual  
536 lophotrochozoan genomes (0.08% - 0.7%)<sup>18,88</sup>. Many of these have contributed to adaptive  
537 divergence between bdelloid rotifer species<sup>89</sup>. However, there are no other ancient asexuals  
538 sequenced and evaluating the role of HGTs in the long-term persistence of asexuality is  
539 therefore not possible. In more recent asexuals, levels of HGT appear mostly low, e.g. in  
540 *Panagrolaimus* (0.63% - 0.66%) and in two tardigrade species (0.8% - 0.97%)<sup>18,30,37</sup>. The only  
541 genome with a high reported fraction of HGT (2.8%) outside of the rotifers is the springtail *F.*  
542 *candida*<sup>23</sup>. This is a meiotic asexual, hence a relaxed constraint on chromosome pairing did  
543 not contribute to the high retention of horizontally acquired genes. Nevertheless, the  
544 presence of a gene for lignocellulose degradation in the springtail and in the root-knot  
545 nematode *M. incognita*, which was likely acquired via HGT in both species, supports an  
546 adaptive role of HGT in these asexuals<sup>23,33</sup>. However, such isolated events of adaptive  
547 HGTs are not specifically linked to asexuality, since they are reported in sexual species as  
548 well<sup>90</sup>. The potential relation of HGT and asexuality will remain unclear until we are able to  
549 reliably identify HGTs in more genomes of asexual as well as sexual species. Indeed,  
550 current reports of HGT are often unreliable because of the difficulty of distinguishing HGT  
551 from contamination<sup>37</sup>.

## 552 Gene family expansions

553 Most genome papers, including those focussing on asexual animals, scan for expansions of  
554 specific gene families. Such expansions are then discussed in the light of the focal species'  
555 biology. The expansion of specific gene families *per se* is thus generally a species-specific  
556 trait<sup>91</sup> that is not related to asexuality. For example, expansions of stress response genes in  
557 *M. incognita*<sup>33</sup>, *Panagrolaimus* spp.<sup>30</sup>, and *R. varieornatus*<sup>38</sup> were suggested to be  
558 associated with the evolution of cryptobiosis in these species. To our knowledge, the only  
559 example of a gene family expansion that could be directly associated with asexuality is the  
560 diversification of the RNA silencing machinery of TEs in bdelloid rotifers<sup>17</sup>. TEs are expected  
561 to evolve reduced activity rates in asexual hosts (see section **Transposable elements**), and  
562 an improved RNA silencing machinery could be the mechanism underlying such reduced  
563 activity rates.

564

565 However, mitotic asexuality might allow for extensive variation in gene copy numbers  
566 between homologous chromosomes as a consequence of relaxed constraints on  
567 chromosome pairing (see also section on **Horizontal gene transfer**). Gene family  
568 expansions (and contractions) could therefore be more extensive and be retained more  
569 frequently in asexual than sexual species. To test this hypothesis, an overall comparison of  
570 gene family expansions in sexual and asexual species is needed (see **Supplementary Text**  
571 **S3**). Four studies have surveyed gene family expansions in asexual species as well as in  
572 (sometimes distantly related) sexual counterparts, but these studies found no differences  
573 between reproductive modes<sup>16,21,23,31</sup>. However, only two of the four studies are based on  
574 asexuals with mitotic asexuality (i.e., where chromosome pairing is not required), and  
575 additional studies are therefore needed to address the question of whether asexuality affects  
576 gene family expansions.

## 577 Discussion

578 We re-analyzed 24 published genomes of asexual animals to investigate whether we can  
579 detect genomic features that are characteristic of asexual animals in general. Many of the  
580 original genome studies highlighted one or a few specific features in their focal asexual  
581 species, and suggested that it might be linked to asexuality. However, our analyses and  
582 review of published studies show that none of these genome features appear to be a general  
583 consequence of asexuality given that none of them was systematically replicated across even  
584 a majority of analyzed species.

585

586 The variation among genomes of asexual species is at least in part due to species- or  
587 lineage-specific traits. But variation among the features detected in the published single-  
588 genome studies is also generated by differences in the methods used. Such differences are  
589 often less obvious, and maybe less interesting to discuss, yet they can be critical in our  
590 assessment of genome diversity among animals. In this work we thus re-analyzed several  
591 key genome features with consistent methods. To minimize the effect of differences in  
592 genome quality, we have used in priority robust methods, e.g. based on sequencing reads  
593 rather than from assemblies. For example, re-estimating heterozygosity levels directly from  
594 reads of each species allowed to show a strong effect of hybrid origin, but not of cellular  
595 mechanism of asexuality (**Figure 2**). Another advantage of using the same methods over all  
596 species is that it diminishes the "researcher degrees of freedom"<sup>92-94</sup>. For example, the  
597 analysis of polyploid genomes requires choosing methods to call heterozygosity and ploidy.  
598 By providing a common framework among species, we have shown that homoeolog  
599 divergence is very diverse among polyploid asexuals.

600

601 We have identified hybrid origin as the major factor affecting heterozygosity levels across all  
602 asexual animal species with available genomic data. This is consistent with the conclusions  
603 of two studies that focussed on individual asexual lineages: hybridization between diverse  
604 strains explains heterozygosity in *Meloidogyne* root knot nematodes and *Lineus* ribbon  
605 worms<sup>34,54</sup>. This rule applies more generally to all the species analysed with known  
606 transitions to asexuality, but it is important to highlight that all the non-hybrid species in our  
607 dataset are hexapods. Thus in principle the low heterozygosity could be a hexapod specific  
608 pattern, for example due to high gene conversion rates in hexapods. The taxonomic range of  
609 the sequenced species is wide but we are missing several clades rich in asexual species,  
610 such as mites or annelids<sup>95,96</sup>. These clades would be useful foci for future genomic studies  
611 of asexual species. Independently of the findings of such future studies, our results suggest  
612 that mitotic gene conversion (that acts independently of palindromes) plays a significant and  
613 highly underappreciated role in the evolution of asexual species of intraspecific origin. For  
614 example, it has been argued that one of the main benefits of sex could be the masking of  
615 recessive deleterious mutations (referred to as “complementation”) which would be exposed  
616 under many forms of meiotic asexuality<sup>97,98</sup>. If gene conversion is indeed pervasive, these  
617 arguments would extend to functionally mitotic forms of asexuality. Conversely, high rates of  
618 gene conversion could also allow for the purging of deleterious mutations while in the  
619 heterozygous state, as in highly selfing species (eg. <sup>99,100</sup>). Such purging could help explain  
620 why most of the genome scale studies did not find support for the theoretical expectation  
621 that asexual reproduction should result in increased rates of deleterious mutation  
622 accumulation (see section **Mutation accumulation and positive selection**). More  
623 generally, given the major differences in genome evolution for asexuals of intra-specific vs.  
624 hybrid origin, our study calls for future theoretical approaches on the maintenance of sex that  
625 explicitly consider the loss vs. the maintenance of heterozygosity in asexuals.

626

627 In our evaluation of the general consequences of asexuality, we were not able to take two  
628 key aspects into account: survivor bias of asexual lineages, and characteristics of sexual  
629 ancestors. How often new asexual lineages emerge from sexual ancestors is completely  
630 unknown, but it has been speculated that in some taxa asexual lineages might emerge  
631 frequently, and then go extinct rapidly because of negative consequences of asexuality. In  
632 other words, asexuals that would exhibit the strongest consequences of asexuality, as  
633 predicted by theoretical models, are expected to go extinct the fastest. Such transient  
634 asexuals remain undetected in natural populations, because research focuses on asexual  
635 species or populations, and not on rare asexual females in sexual populations. Indeed, most  
636 of the species included in our study have persisted as asexuals for hundreds of thousands to

637 millions of years. They might thus be mostly representative of the subset of lineages that  
638 suffer weaker consequences of asexuality. Finally, the key constraint for identifying  
639 consequences of asexuality is that almost none of the published genome studies of asexual  
640 animals included comparisons to close sexual relatives. This prevents the detection of  
641 specific effects of asexuality, controlling for the variation among sexual species - which is  
642 extensive for all of the genome features we analyzed and discussed in our study. Overall,  
643 despite the importance of recombination rate variation for understanding the evolution of  
644 sexual animal genomes (e.g., <sup>101,102</sup>), the genome-wide absence of recombination does not  
645 appear to have the dramatic effects which are expected from classical theoretical models.  
646 The reasons for this are probably a combination of lineage-specific patterns, differences  
647 according to the origin of asexuality, and survivor bias of asexual lineages.

## 648 Methods

649 We combined different methods into a complete pipeline that collects published assemblies,  
650 sequencing reads, and genome annotation data from online databases, and automatically  
651 computes the genome features discussed here. The methods for the different steps in the  
652 pipeline are detailed below. The pipeline is available at  
653 <https://github.com/KamilSJaron/genomic-features-of-aseexual-animals>. We used this pipeline  
654 to gather and analyze the data for 29 sequenced individuals from 24 asexual species. For  
655 some species, additional genomes to the ones we used were available, but we did not  
656 include them because of low data quality and/or unavailable illumina reads (this was the  
657 case for one sample of *M. incognita*, *M. floridensis* and multiple samples of *D. pulex* <sup>24,33,36</sup> ).  
658 Overall, the genome features computed were: ploidy, genome size, heterozygosity,  
659 heterozygosity, haplotype divergence structure, transposable elements/ repeat content,  
660 conserved gene content (see **Supplementary Text S3**), and palindrome abundance.

661  
662 Core genome features (ploidy, haploid genome size, heterozygosity, repetitive fraction of the  
663 genome, and characterisation of TE content) were estimated directly from sequencing reads  
664 to avoid potential assembly biases in reference genome-based approaches. The raw reads  
665 were publicly available for 27 samples and for three more samples shared by authors on  
666 request. We cleaned the raw reads by removing adaptors and low quality bases using  
667 Skewer (parameters “-z -m pe -n -q 26 -l 21”) <sup>103</sup>.

668  
669 We used smudgeplot v0.1.3 (available at <https://github.com/tbenavi1/smudgeplot>) to  
670 estimate ploidy levels. This method extracts from the read set unique kmer pairs that differ  
671 by one SNP from each other. These kmer pairs are inferred to derive from heterozygous

672 genome regions. The sum of coverages of the kmer pairs is then compared against their  
673 coverage ratio. This comparison separates different haplotype structures (**Supplementary**  
674 **Figure 1b**). The most prevalent structure is then indicative of the overall ploidy of the  
675 genome. We used this ploidy estimate in all species, except *A. vaga*. The most prevalent  
676 structure suggested that this species is diploid. *A. vaga* is well characterized as tetraploid<sup>58</sup>,  
677 but we were unable to detect tetraploidy because homoeologs are too diverged to be  
678 identified as such by the kmer-based smudgeplot method.

679

680 Using the inferred ploidy levels, we then estimated genome size and heterozygosity using an  
681 extended version of GenomeScope<sup>104</sup>. GenomeScope estimates genome wide  
682 heterozygosity via kmer spectra analysis, that is, by fitting a mixture model of evenly spaced  
683 negative binomial distributions, where the number of fitted distributions is decided given the  
684 input ploidy. Estimated distributions correspond to kmers that occur once, twice, etc., in the  
685 genome. Fits are then used to estimate heterozygosity, the fraction of repeats in the  
686 genome, as well as the 1n sequencing coverage. The latter is subsequently used for  
687 estimation of genome size. The definition of heterozygosity for polyploids is not well  
688 established (see **Box 3**), but GenomeScope distinguishes different types of heterozygous  
689 loci in polyploids (as shown in **Figure 3**).

690

691 Kmer spectra analysis is affected by the choice of kmer length. Longer kmers require higher  
692 sequencing coverage, but lead to more informative kmer spectra. We have chosen the  
693 default kmer size 21 nt for all species except the marbled crayfish, where we chose kmer  
694 length 17 nt due to low sequencing coverage.

695

696 We quantified transposable elements using DnaPipeTE v1.2<sup>105</sup>. The method uses haploid  
697 genome size (parameter -genome\_size) to subsample sequencing reads to 0.5x coverage  
698 (parameter -genome\_coverage). Subsampled reads are then assembled using an assembler  
699 that can deal with uneven coverages, and annotated using the database of known TEs. This  
700 process is repeated three times (parameter -sample\_number), and the union of results  
701 represents the repeat library. Additionally, repeats are annotated as TEs if their sequence  
702 matches known TEs by homology (for details see<sup>105</sup>). Our reported values of TE loads  
703 include only repeats that were annotated as TEs, i.e., we did not include 'unknown' repeats  
704 which consist of tandem repeats (satellite repeats), duplications or very divergent/unknown  
705 TEs.

706

707 The palindrome analysis was based on genome assemblies and their published annotations,  
708 from 27 samples of 22 species (annotations were not available for *D. pulex* and *A. rufus*).

709 We performed collinearity analysis using MCScanX (untagged version released 28.3.2013)  
710 <sup>106</sup>, allowing even a single gene to form a collinear bloc (parameter -s) if there were fewer  
711 than 100 genes in between (parameter -m). The output was then filtered to contain only  
712 blocs on the same scaffold in a reverse order. Furthermore we filtered all the homologous  
713 gene pairs that have appeared on the same strand. All the remaining blocks are  
714 palindromes, blocs built of reverse complementary genes on the same scaffold. See  
715 **Supplementary Text S2** for more details.

## 716 References

- 717 1. Neiman, M., Lively, C. M. & Meirmans, S. Why sex? A pluralist approach revisited.  
718 *Trends Ecol. Evol.* **32**, 589–600 (2017).
- 719 2. Sharp, N. P. & Otto, S. P. Evolution of sex: Using experimental genomics to select  
720 among competing theories. *Bioessays* **38**, 751–757 (2016).
- 721 3. Bell, G. *The Masterpiece of Nature: The Evolution and Genetics of Sexuality*. (Univ of  
722 California Press, 1982).
- 723 4. Suomalainen, E., Saura, A. & Lokki, J. *Cytology and evolution in parthenogenesis*.  
724 (CRC Press, 1987).
- 725 5. Muller, H. J. The relation of recombination to mutational advance. *Mutat. Res.* **1**, 2–9  
726 (1964).
- 727 6. Felsenstein, J. The evolutionary advantage of recombination. *Genetics* **78**, 737–756  
728 (1974).
- 729 7. Keightley, P. D. & Otto, S. P. Interference among deleterious mutations favours sex and  
730 recombination in finite populations. *Nature* **443**, 89–92 (2006).
- 731 8. Birky, C. W., Jr. Heterozygosity, heteromorphy, and phylogenetic trees in asexual  
732 eukaryotes. *Genetics* **144**, 427–437 (1996).
- 733 9. Balloux, F., Lehmann, L. & de Meeûs, T. The population genetics of clonal and partially  
734 clonal diploids. *Genetics* **164**, 1635–1644 (2003).
- 735 10. Hickey, D. A. Selfish DNA: a sexually-transmitted nuclear parasite. *Genetics* **101**, 519–  
736 531 (1982).



- 737 11. Brandt, A. *et al.* Effective purifying selection in ancient asexual oribatid mites. *Nat.*  
738 *Commun.* **8**, 873 (2017).
- 739 12. Fontaneto, D., Tang, C. Q., Obertegger, U., Leasi, F. & Barraclough, T. G. Different  
740 diversification rates between sexual and asexual organisms. *Evol. Biol.* **39**, 262–270  
741 (2012).
- 742 13. Arkhipova, I. R. & Rodriguez, F. Genetic and epigenetic changes involving  
743 (retro)transposons in animal hybrids and polyploids. *Cytogenet. Genome Res.* **140**,  
744 295–311 (2013).
- 745 14. Neiman, M., Sharbel, T. F. & Schwander, T. Genetic causes of transitions from sexual  
746 reproduction to asexuality in plants and animals. *J. Evol. Biol.* **27**, 1346–1359 (2014).
- 747 15. Rodriguez, F. & Arkhipova, I. R. Transposable elements and polyploid evolution in  
748 animals. *Curr. Opin. Genet. Dev.* **49**, 115–123 (2018).
- 749 16. Warren, W. C. *et al.* Clonal polymorphism and high heterozygosity in the celibate  
750 genome of the Amazon molly. *Nat Ecol Evol* **2**, 669–679 (2018).
- 751 17. Flot, J.-F. *et al.* Genomic evidence for ameiotic evolution in the bdelloid rotifer *Adineta*  
752 *vaga*. *Nature* **500**, 453–457 (2013).
- 753 18. Nowell, R. W. *et al.* Comparative genomics of bdelloid rotifers: Insights from desiccating  
754 and nondesiccating species. *PLoS Biol.* **16**, e2004830 (2018).
- 755 19. Kraaijeveld, K. *et al.* Decay of sexual trait genes in an asexual parasitoid wasp. *Genome*  
756 *Biol. Evol.* **8**, 3685–3695 (2016).
- 757 20. Bast, J. *et al.* No accumulation of transposable elements in asexual arthropods. *Mol.*  
758 *Biol. Evol.* **33**, 697–706 (2016).
- 759 21. Lindsey, A. R. I. *et al.* Comparative genomics of the miniature wasp and pest control  
760 agent *Trichogramma pretiosum*. *BMC Biol.* **16**, 54 (2018).
- 761 22. Oxley, P. R. *et al.* The genome of the clonal raider ant *Cerapachys biroi*. *Curr. Biol.* **24**,  
762 451–458 (2014).
- 763 23. Faddeeva-Vakhrusheva, A. *et al.* Coping with living in the soil: the genome of the  
764 parthenogenetic springtail *Folsomia candida*. *BMC Genomics* **18**, 493 (2017).

- 765 24. Tucker, A. E., Ackerman, M. S., Eads, B. D., Xu, S. & Lynch, M. Population-genomic  
766 insights into the evolutionary origin and fate of obligately asexual *Daphnia pulex*. *Proc.*  
767 *Natl. Acad. Sci. U. S. A.* **110**, 15740–15745 (2013).
- 768 25. Xu, S., Omilian, A. R. & Cristescu, M. E. High rate of large-scale hemizygous deletions  
769 in asexually propagating *Daphnia*: implications for the evolution of sex. *Mol. Biol. Evol.*  
770 **28**, 335–342 (2011).
- 771 26. Jiang, X., Tang, H., Ye, Z. & Lynch, M. Insertion polymorphisms of mobile genetic  
772 elements in sexual and asexual populations of *Daphnia pulex*. *Genome Biol. Evol.*  
773 (2017). doi:10.1093/gbe/evw302
- 774 27. Gutekunst, J. *et al.* Clonal genome evolution and rapid invasive spread of the marbled  
775 crayfish. *Nat Ecol Evol* **2**, 567–573 (2018).
- 776 28. Hiraki, H. *et al.* Genome analysis of *Diploscapter coronatus*: insights into molecular  
777 peculiarities of a nematode with parthenogenetic reproduction. *BMC Genomics* **18**, 478  
778 (2017).
- 779 29. Fradin, H. *et al.* Genome architecture and evolution of a unichromosomal asexual  
780 nematode. *Curr. Biol.* **27**, 2928–2939.e6 (2017).
- 781 30. Schiffer, P. H. *et al.* Signatures of the evolution of parthenogenesis and cryptobiosis in  
782 the genomes of panagrolaimid nematodes. *bioRxiv* 159152 (2017). doi:10.1101/159152
- 783 31. Schiffer, P. H. *et al.* The gene regulatory program of *Acrobeloides nanus* reveals  
784 conservation of phylum-specific expression. *Proc. Natl. Acad. Sci. U. S. A.* **115**, 4459–  
785 4464 (2018).
- 786 32. Blanc-Mathieu, R. *et al.* Hybridization and polyploidy enable genomic plasticity without  
787 sex in the most devastating plant-parasitic nematodes. *PLoS Genet.* **13**, e1006777  
788 (2017).
- 789 33. Abad, P. *et al.* Genome sequence of the metazoan plant-parasitic nematode  
790 *Meloidogyne incognita*. *Nat. Biotechnol.* **26**, 909–915 (2008).
- 791 34. Szitenberg, A. *et al.* Comparative genomics of apomictic root-knot nematodes:  
792 hybridization, ploidy, and dynamic genome change. *Genome Biol. Evol.* **9**, 2844–2861

- 793 (2017).
- 794 35. Szitenberg, A. *et al.* Genetic Drift, Not Life History or RNAi, Determine Long-Term  
795 Evolution of Transposable Elements. *Genome Biol. Evol.* **8**, 2964–2978 (2016).
- 796 36. Lunt, D. H., Kumar, S., Koutsovoulos, G. & Blaxter, M. L. The complex hybrid origins of  
797 the root knot nematodes revealed through comparative genomics. *PeerJ* **2**, e356  
798 (2014).
- 799 37. Koutsovoulos, G. *et al.* No evidence for extensive horizontal gene transfer in the  
800 genome of the tardigrade *Hypsibius dujardini*. *Proc. Natl. Acad. Sci. U. S. A.* **113**, 5053–  
801 5058 (2016).
- 802 38. Hashimoto, T. *et al.* Extremotolerant tardigrade genome and improved radiotolerance of  
803 human cultured cells by tardigrade-unique protein. *Nat. Commun.* **7**, 12808 (2016).
- 804 39. Cavalier-Smith, T. Origins of the machinery of recombination and sex. *Heredity* **88**,  
805 125–141 (2002).
- 806 40. Schultz, R. J. Unisexual fish: laboratory synthesis of a ‘species’. *Science* **179**, 180–181  
807 (1973).
- 808 41. van der Kooij, C. J., Matthey-Doret, C. & Schwander, T. Evolution and comparative  
809 ecology of parthenogenesis in haplodiploid arthropods. *Evol Lett* **1**, 304–316 (2017).
- 810 42. Engelstädter, J. Asexual but not clonal: evolutionary processes in automictic  
811 populations. *Genetics* **206**, 993–1009 (2017).
- 812 43. Lenormand, T., Engelstädter, J., Johnston, S. E., Wijnker, E. & Haag, C. R. Evolutionary  
813 mysteries in meiosis. *Philos. Trans. R. Soc. Lond. B Biol. Sci.* **371**, (2016).
- 814 44. Melters, D. P., Paliulis, L. V., Korf, I. F. & Chan, S. W. L. Holocentric chromosomes:  
815 convergent evolution, meiotic adaptations, and genomic analysis. *Chromosome Res.*  
816 **20**, 579–593 (2012).
- 817 45. Cifuentes, M., Grandont, L., Moore, G., Chèvre, A. M. & Jenczewski, E. Genetic  
818 regulation of meiosis in polyploid species: new insights into an old question. *New Phytol.*  
819 **186**, 29–36 (2010).
- 820 46. Schurko, A. M., Neiman, M. & Logsdon, J. M. Signs of sex: what we know and how we

- 821 know it. *Trends Ecol. Evol.* **24**, 208–217 (2009).
- 822 47. Neiman, M., Meirmans, S. & Meirmans, P. G. What can asexual lineage age tell us  
823 about the maintenance of sex? *Ann. N. Y. Acad. Sci.* **1168**, 185–200 (2009).
- 824 48. Hill, W. G. & Robertson, A. The effect of linkage on limits to artificial selection. *Genet.*  
825 *Res.* **8**, 269–294 (1966).
- 826 49. Fisher, R. A. *The genetical theory of natural selection.* **154**, (Clarendon Press, 1930).
- 827 50. Muller, H. J. Some genetic aspects of sex. *Am. Nat.* 118–138 (1932).
- 828 51. Neiman, M., Meirmans, P. G., Schwander, T. & Meirmans, S. Sex in the wild: How and  
829 why field-based studies contribute to solving the problem of sex. *Evolution* **72**, 1194–  
830 1203 (2018).
- 831 52. Bast, J. *et al.* Consequences of asexuality in natural populations: insights from stick  
832 insects. *Mol. Biol. Evol.* **35**, 1668–1677 (2018).
- 833 53. Hollister, J. D. *et al.* Recurrent loss of sex is associated with accumulation of deleterious  
834 mutations in *Oenothera*. *Mol. Biol. Evol.* **32**, 896–905 (2015).
- 835 54. Ament-Velásquez, S. L. *et al.* Population genomics of sexual and asexual lineages in  
836 fissiparous ribbon worms (*Lineus*, *Nemertea*): hybridization, polyploidy and the  
837 Meselson effect. *Mol. Ecol.* **25**, 3356–3369 (2016).
- 838 55. Schön, I., Martens, K. & Dijk, P. van. *Lost sex: the evolutionary biology of*  
839 *parthenogenesis*. (Springer, 2009).
- 840 56. Hartl, D. L. & Clark, A. G. *Principles of population genetics.* **116**, (Sinauer associates  
841 Sunderland, 1997).
- 842 57. Glover, N. M., Redestig, H. & Dessimoz, C. Homoeologs: what are they and how do we  
843 infer them? *Trends Plant Sci.* **21**, 609–621 (2016).
- 844 58. Mark Welch, D. B., Mark Welch, J. L. & Meselson, M. Evidence for degenerate  
845 tetraploidy in bdelloid rotifers. *Proc. Natl. Acad. Sci. U. S. A.* **105**, 5145–5149 (2008).
- 846 59. Weir, W. *et al.* Population genomics reveals the origin and asexual evolution of human  
847 infective trypanosomes. *Elife* **5**, 1–14 (2016).
- 848 60. Rozen, S. *et al.* Abundant gene conversion between arms of palindromes in human and

- 849 ape Y chromosomes. *Nature* **423**, 873–876 (2003).
- 850 61. Marais, G. A. B., Campos, P. R. A. & Gordo, I. Can intra-Y gene conversion oppose the  
851 degeneration of the human Y chromosome? A simulation study. *Genome Biol. Evol.* **2**,  
852 347–357 (2010).
- 853 62. Trombetta, B. & Cruciani, F. Y chromosome palindromes and gene conversion. *Hum.*  
854 *Genet.* **136**, 605–619 (2017).
- 855 63. Fan, S. & Meyer, A. Evolution of genomic structural variation and genomic architecture  
856 in the adaptive radiations of African cichlid fishes. *Front. Genet.* **5**, 163 (2014).
- 857 64. Chen, L., Chamberlain, A. J., Reich, C. M., Daetwyler, H. D. & Hayes, B. J. Detection  
858 and validation of structural variations in bovine whole-genome sequence data. *Genet.*  
859 *Sel. Evol.* **49**, 13 (2017).
- 860 65. Hum, Y. F. & Jinks-Robertson, S. Mitotic gene conversion tracts associated with repair  
861 of a defined double-strand break in *Saccharomyces cerevisiae*. *Genetics* **207**, 115–128  
862 (2017).
- 863 66. Lee, P. S. *et al.* A fine-structure map of spontaneous mitotic crossovers in the yeast  
864 *Saccharomyces cerevisiae*. *PLoS Genet.* **5**, e1000410 (2009).
- 865 67. Keith, N. *et al.* High mutational rates of large-scale duplication and deletion in *Daphnia*  
866 *pulex*. *Genome Res.* **26**, 60–69 (2016).
- 867 68. Wicker, T., Sabot, F., Hua-Van, A. & Bennetzen, J. L. A unified classification system for  
868 eukaryotic transposable elements. *Nat. Rev. Genet.* **8**, 973–982 (2007).
- 869 69. Burt, A. & Trivers, R. *Genes in conflict: the biology of selfish genetic elements*.  
870 (Belknap Press, 2006).
- 871 70. Doolittle, W. F. & Sapienza, C. Selfish genes, the phenotype paradigm and genome  
872 evolution. *Nature* **284**, 601–603 (1980).
- 873 71. Le Rouzic, A., Boutin, T. S. & Capy, P. Long-term evolution of transposable elements.  
874 *Proc. Natl. Acad. Sci. U. S. A.* **104**, 19375–19380 (2007).
- 875 72. Hua-Van, A., Le Rouzic, A., Boutin, T. S., Filée, J. & Capy, P. The struggle for life of the  
876 genome's selfish architects. *Biol. Direct* **6**, 19 (2011).

- 877 73. Zeyl, C., Bell, G. & Green, D. M. Sex and the spread of retrotransposon Ty3 in  
878 experimental populations of *Saccharomyces cerevisiae*. *Genetics* **143**, 1567–1577  
879 (1996).
- 880 74. Nuzhdin, S. V. & Petrov, D. A. Transposable elements in clonal lineages: lethal  
881 hangover from sex. *Biol. J. Linn. Soc. Lond.* **79**, 33–41 (2003).
- 882 75. Wright, S. & Finnegan, D. Genome evolution: Sex and the transposable element. *Curr.*  
883 *Biol.* **11**, R296–R299 (2001).
- 884 76. Arkhipova, I. & Meselson, M. Transposable elements in sexual and ancient asexual  
885 taxa. *Proc. Natl. Acad. Sci. U. S. A.* **97**, 14473–14477 (2000).
- 886 77. Canapa, A., Barucca, M., Biscotti, M. A., Forconi, M. & Olmo, E. Transposons, genome  
887 size, and evolutionary insights in animals. *Cytogenet. Genome Res.* **147**, 217–239  
888 (2015).
- 889 78. Kofler, R., Betancourt, A. J. & Schlötterer, C. Sequencing of pooled DNA samples (Pool-  
890 Seq) uncovers complex dynamics of transposable element insertions in *Drosophila*  
891 *melanogaster*. *PLoS Genet.* **8**, e1002487 (2012).
- 892 79. Aravin, A. a., Hannon, G. J. & Brennecke, J. The Piwi-piRNA pathway provides an  
893 adaptive defense in the transposon arms race. *Science* **318**, 761–764 (2007).
- 894 80. Agren, J. A., Greiner, S., Johnson, M. T. & Wright, S. I. No evidence that sex and  
895 transposable elements drive genome size variation in evening primroses. *Evolution* **69**,  
896 1053–1062 (2015).
- 897 81. Agren, J. A. & Wright, S. I. Co-evolution between transposable elements and their  
898 hosts: a major factor in genome size evolution? *Chromosome Res.* **19**, 777–786 (2011).
- 899 82. Romero-Soriano, V. *et al.* Transposable element misregulation is linked to the  
900 divergence between parental piRNA pathways in *Drosophila* hybrids. *Genome Biol.*  
901 *Evol.* **9**, 1450–1470 (2017).
- 902 83. van der Kooij, C. J. & Schwander, T. On the fate of sexual traits under asexuality. *Biol.*  
903 *Rev. Camb. Philos. Soc.* **89**, 805–819 (2014).
- 904 84. Schwander, T., Crespi, B. J., Gries, R. & Gries, G. Neutral and selection-driven decay of

- 905 sexual traits in asexual stick insects. *Proc. Biol. Sci.* **280**, 20130823 (2013).
- 906 85. Schurko, A. M. & Logsdon, J. M. Using a meiosis detection toolkit to investigate ancient  
907 asexual 'scandals' and the evolution of sex. *Bioessays* **30**, 579–589 (2008).
- 908 86. Tvedte, E. S., Forbes, A. A. & Logsdon, J. M., Jr. Retention of core meiotic genes  
909 across diverse Hymenoptera. *J. Hered.* **108**, 791–806 (2017).
- 910 87. Danchin, E. G. J. *et al.* Multiple lateral gene transfers and duplications have promoted  
911 plant parasitism ability in nematodes. *Proc. Natl. Acad. Sci. U. S. A.* **107**, 17651–17656  
912 (2010).
- 913 88. Gladyshev, E. A., Meselson, M. & Arkhipova, I. R. Massive horizontal gene transfer in  
914 bdelloid rotifers. *Science* **320**, 1210–1213 (2008).
- 915 89. Boschetti, C. *et al.* Biochemical Diversification through Foreign Gene Expression in  
916 Bdelloid Rotifers. *PLoS Genet.* **8**, e1003035 (2012).
- 917 90. Boto, L. Horizontal gene transfer in the acquisition of novel traits by metazoans. *Proc.*  
918 *Biol. Sci.* **281**, 20132450 (2014).
- 919 91. Lespinet, O., Wolf, Y. I., Koonin, E. V. & Aravind, L. The role of lineage-specific gene  
920 family expansion in the evolution of eukaryotes. *Genome Res.* **12**, 1048–1059 (2002).
- 921 92. Wallach, J. D., Boyack, K. W. & Ioannidis, J. P. A. Reproducible research practices,  
922 transparency, and open access data in the biomedical literature, 2015-2017. *PLoS Biol.*  
923 **16**, e2006930 (2018).
- 924 93. Simmons, J. P., Nelson, L. D. & Simonsohn, U. False-positive psychology: undisclosed  
925 flexibility in data collection and analysis allows presenting anything as significant.  
926 *Psychol. Sci.* **22**, 1359–1366 (2011).
- 927 94. Gelman, A. & Loken, E. The garden of forking paths: Why multiple comparisons can be  
928 a problem, even when there is no 'fishing expedition' or 'p-hacking' and the research  
929 hypothesis was posited ahead of time. (2013).
- 930 95. Veresoglou, S. D., Halley, J. M. & Rillig, M. C. Extinction risk of soil biota. *Nat. Commun.*  
931 **6**, 8862 (2015).
- 932 96. Norton, R. A. & Palmer, S. C. The distribution, mechanisms and evolutionary

- 933 significance of parthenogenesis in oribatid mites. in *The Acari: Reproduction,*  
934 *development and life-history strategies* (eds. Schuster, R. & Murphy, P. W.) 107–136  
935 (Springer Netherlands, 1991).
- 936 97. Archetti, M. Complementation, genetic conflict, and the evolution of sex and  
937 recombination. *J. Hered.* **101**, 21–33 (2010).
- 938 98. Archetti, M. Recombination and loss of complementation: a more than two-fold cost for  
939 parthenogenesis. *J. Evol. Biol.* **17**, 1084–1097 (2004).
- 940 99. Szövényi, P. *et al.* Efficient purging of deleterious mutations in plants with haploid  
941 selfing. *Genome Biol. Evol.* **6**, 1238–1252 (2014).
- 942 100. Glémin, S. & Ronfort, J. Adaptation and maladaptation in selfing and outcrossing  
943 species: new mutations versus standing variation. *Evolution* **67**, 225–240 (2013).
- 944 101. Stapley, J., Feulner, P. G. D., Johnston, S. E., Santure, A. W. & Smadja, C. M.  
945 Recombination: the good, the bad and the variable. *Philos. Trans. R. Soc. Lond. B Biol.*  
946 *Sci.* **372**, (2017).
- 947 102. Bachtrog, D. Y-chromosome evolution: emerging insights into processes of Y-  
948 chromosome degeneration. *Nat. Rev. Genet.* **14**, 113–124 (2013).
- 949 103. Jiang, H., Lei, R., Ding, S.-W. & Zhu, S. Skewer: a fast and accurate adapter trimmer for  
950 next-generation sequencing paired-end reads. *BMC Bioinformatics* **15**, 182 (2014).
- 951 104. Vurture, G. W. *et al.* GenomeScope: fast reference-free genome profiling from short  
952 reads. *Bioinformatics* **33**, 2202–2204 (2017).
- 953 105. Goubert, C. *et al.* De novo assembly and annotation of the Asian tiger mosquito (*Aedes*  
954 *albopictus*) repeatome with dnaPipeTE from raw genomic reads and comparative  
955 analysis with the yellow fever mosquito (*Aedes aegypti*). *Genome Biol. Evol.* **7**, 1192–  
956 1205 (2015).
- 957 106. Wang, Y. *et al.* MCScanX: a toolkit for detection and evolutionary analysis of gene  
958 synteny and collinearity. *Nucleic Acids Res.* **40**, e49 (2012).
- 959 107. Handoo, Z. A. *et al.* Morphological, molecular, and differential-host characterization of  
960 *Meloidogyne floridensis* n. sp. (Nematoda: Meloidogynidae), a root-knot nematode



- 961 parasitizing peach in Florida. *J. Nematol.* **36**, 20–35 (2004).
- 962 108. Lahl, V., Sadler, B. & Schierenberg, E. Egg development in parthenogenetic  
963 nematodes: variations in meiosis and axis formation. *Int. J. Dev. Biol.* **50**, 393–398  
964 (2006).
- 965 109. Waterhouse, R. M. *et al.* BUSCO applications from quality assessments to gene  
966 prediction and phylogenomics. *Mol. Biol. Evol.* **35**, 543–548 (2017).

967 **Acknowledgments:** We would like to thank Philipp H. Schiffer, Jean-Francois Flot, Reuben  
968 W. Nowell, Yuko Ulrich, Dave Lunt, Julian Gutekunst and Mark Blaxter for comments and  
969 discussions. We would also like to thank all the authors who deposited their data in public  
970 databases with correct metadata and all the authors who were helpful when we asked for  
971 data or clarifications.

972 **Funding:** This study was supported by funding from Swiss SNF grants PP00P3\_170627  
973 and CRSII3\_160723.

974 **Author contributions:** K.S.J. and T.S. conceived the study, K.S.J. and J.B. collected the  
975 data; K.S.J. and T.R.R.B. performed the analyses; K.S.J., J.B. and T.S. reviewed the  
976 literature; K.S.J., T.S., J.B. and M.R.R. wrote the manuscript; All authors were involved in  
977 discussions about results and interpretations.

978 **Competing interests:** None declared.

## 979 Supplementary materials

### 980 S1 Ploidy and reproductive mode of *M. floridensis*

981 The nematode *M. floridensis* was reported as a diploid species with a mechanism of  
982 asexuality functionally equivalent to terminal fusion (absence of the 2nd meiotic division),  
983 based on cytological analyses<sup>107</sup>. Our analyses indicate that *M. floridensis* is triploid rather  
984 than diploid (**Supplementary Figure 1**), and the heterozygosity detected in our and previous  
985 studies<sup>107</sup> is inconsistent with classical terminal fusion (which should result in largely  
986 homozygous genomes, see Box 2 and **Figure 2**). Terminal fusion can be associated with  
987 high heterozygosity under inverted meiosis (which is most likely the case in nematodes of  
988 the genus *Acrobeloides*<sup>108</sup>. However, inverted meiosis in *M. floridensis* is rather unlikely  
989 given that all other meiotic species in the genus have regular meiosis. We therefore believe  
990 that the study of Handoo *et al* is either based on an unusual *M. floridensis* strain that has not  
991 been used in any genome study thus far or that the cytology inferred by Handoo *et al* is not

992 correct. These interpretations are further supported by the fact that Handoo et al report on  
993 analyses of large numbers of males of *M. floridensis*, while males are unknown/unusual for  
994 the strains used in the genome studies. Unfortunately, it is impossible to evaluate the  
995 evidence that supported diploidy and terminal fusion in *M. floridensis* as the study by  
996 Handoo et al does not include pictures of karyotypes or egg cells (which is very unusual for  
997 this type of research). Given the genomic evidence is very clear, we consider *M. floridensis*  
998 to be triploid for all our analyses and the cellular mechanism of asexuality as “unknown”.

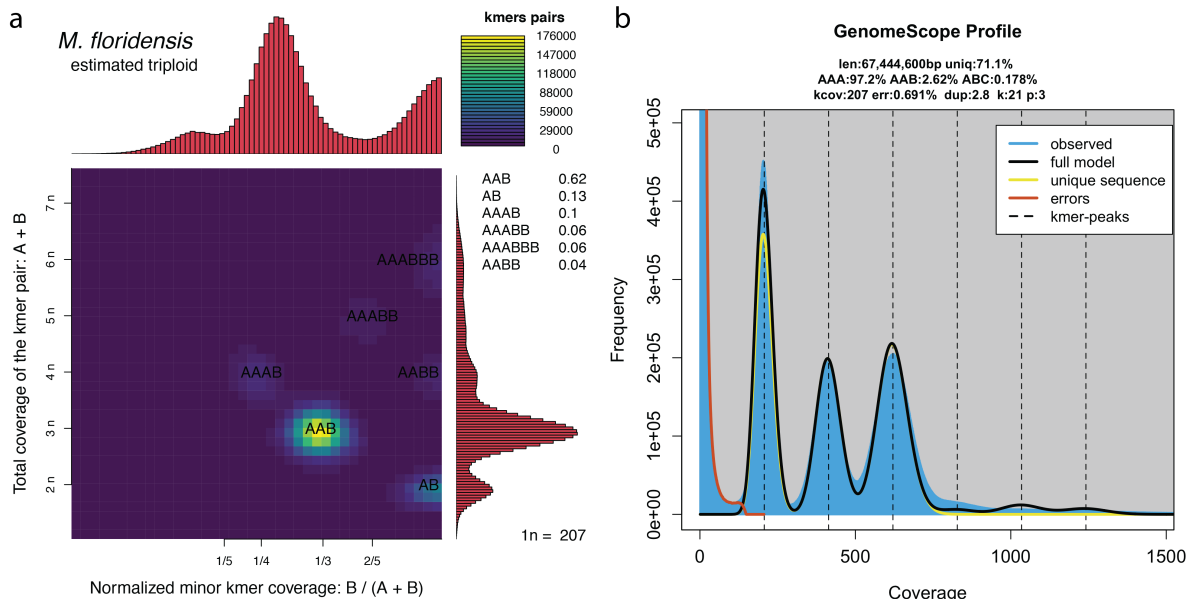

999

1000 **Supplementary Figure 1: Genomic evidence of triploidy in *M. floridensis*.** **a** | the  
1001 smudgeplot shows dominance of a triploid (AAB) genome structure. The smudges  
1002 corresponding to higher ploïdies are likely originating from paralogs. The diploid kmer pairs  
1003 (AB) represent situations where the third allele is diverged from the two more than one  
1004 nucleotide. **b** | kmer spectra analysis of *M. floridensis* shows a typical triploid genome  
1005 structure with haploid, diploid and triploid peaks and expected distances from each other.

## 1006 S2 Palindrome detection

1007 Palindromes are formed by two homologous reverse complementary sequences on the  
1008 same chromosome (**Supplementary Figure 2**). Palindromes can facilitate gene conversion  
1009 and therefore help to escape mutational meltdown via Muller's ratchet<sup>61,62</sup>. To test if they  
1010 play such a role in asexual organisms we identify palindromes using colinearity analysis  
1011 implemented in program MCSanX<sup>106</sup>. The default parameters of the software (used in the  
1012 genome studies of asexual species, personal communication of the authors of<sup>17,23</sup>) define a  
1013 collinear block as a sequence of at least 5 genes that are no more than 25 genes apart from  
1014 each other and then search for such blocks with palindromic arrangement. We have  
1015 reanalysed the genomes allowing for short palindromes of a single gene because a

1016 palindrome could carry fewer than five genes and still be biologically relevant. Detected  
1017 collinear blocks were filtered to contain only reverse complementary collinear blocks on the  
1018 same chromosome, since only such structures have the capacity to form a hairpin  
1019 (**Supplementary Figure 2**).

1020

1021 We note that it is important to check consistency between the biological interpretation of  
1022 results, and the methods used to infer them. The bioinformatics pipelines used to detect  
1023 palindromes are geared towards detecting large repeated blocks with large gaps. We argue  
1024 that small blocks (as small as one gene), but with no gaps within the inverted repeat may  
1025 also generate gene conversion. Thus, re-screening the published genomes for palindromes  
1026 allowed us to provide a more robust and unbiased view of the importance of palindromes for  
1027 the evolution of asexual species. (cit).

1028

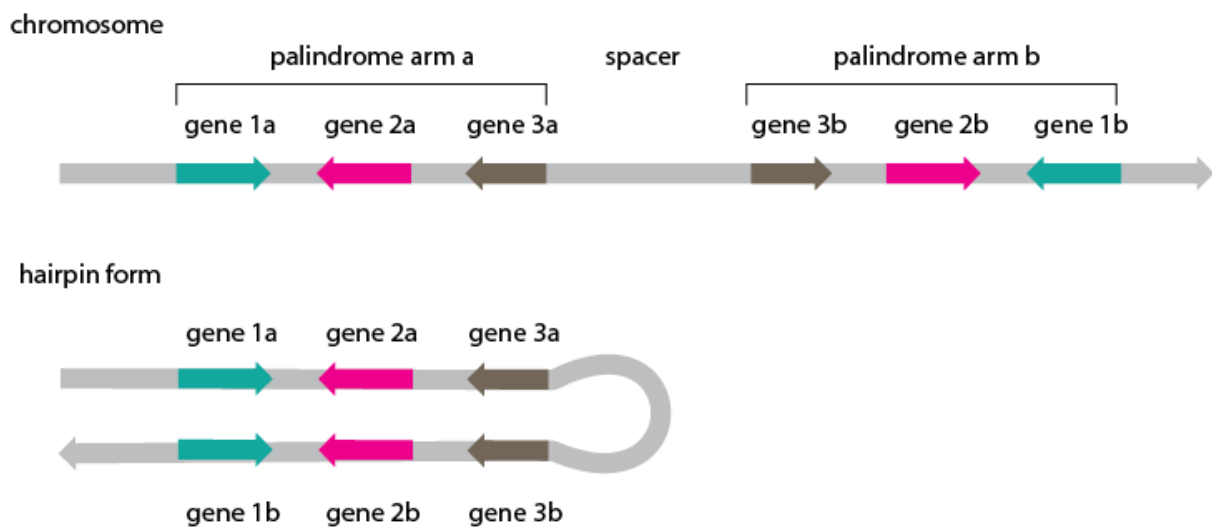

1029

1030 **Supplementary Figure 2: Palindrome structure.** The two homologous reverse  
1031 complementary regions (arms) of a palindrome are located on the same chromosome. This  
1032 organisation allows for the formation of a hairpin and can facilitate gene conversion between  
1033 the palindrome arms.

1034

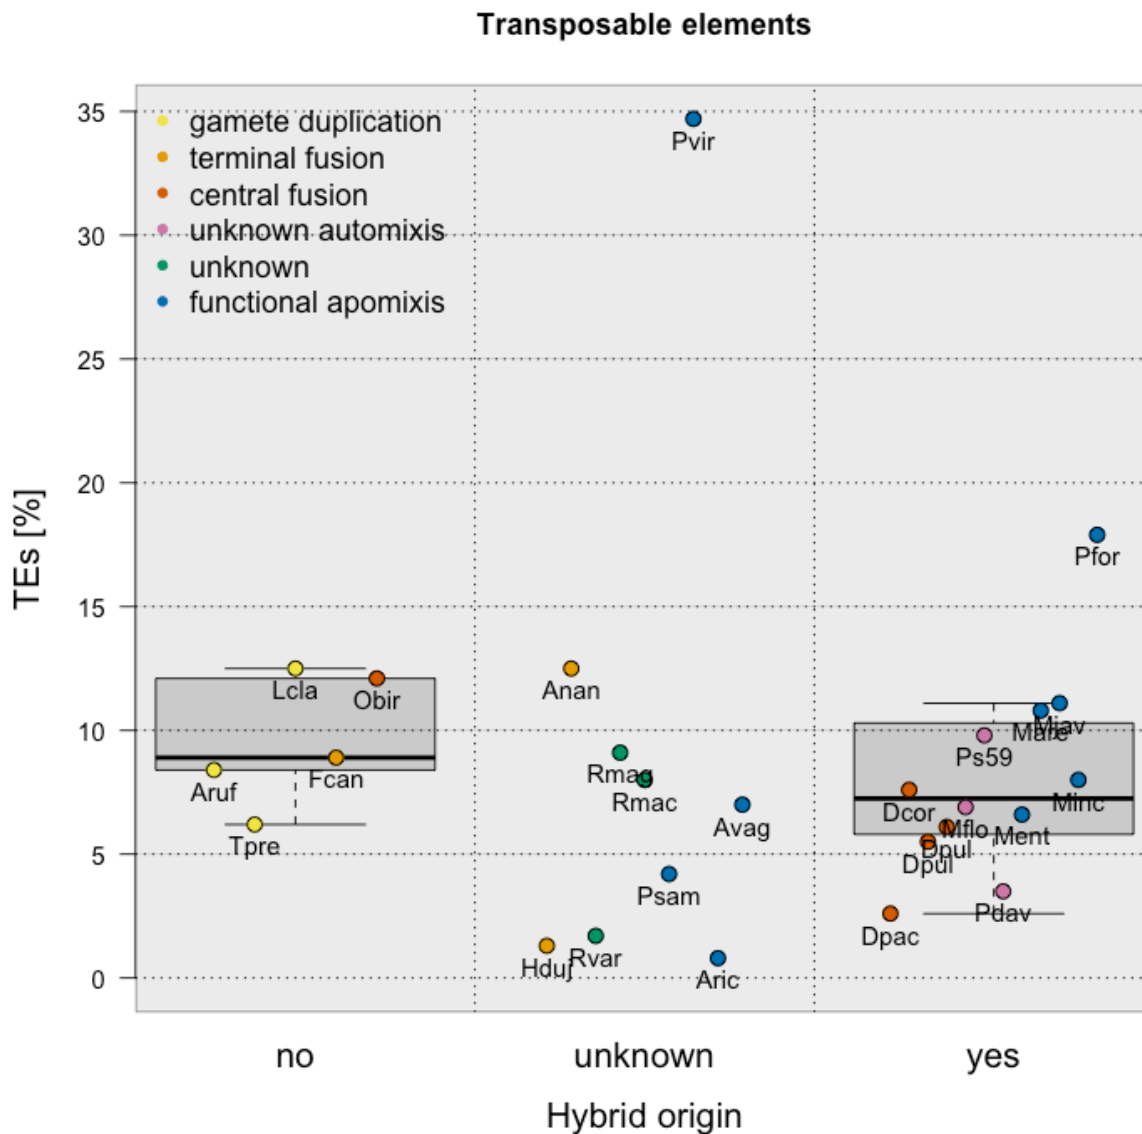

1035  
1036

1037 **Supplementary Figure 3: Transposable elements with respect to reproduction mode**

1038 **and hybrid origin.** Neither hybrid origin ( $p$ -value = 0.36) nor cellular mechanism of

1039 asexuality ( $p$ -value = 0.84) are strong drivers of the TE content in asexual animals.

1040 S3 Conserved gene content

1041

1042 We aimed to provide insights into gene duplications and losses by quantifying conserved  
1043 single copy orthologs (BUSCO genes)<sup>109</sup>. BUSCO genes are defined as a set of genes that  
1044 are present as a single copy in at least 90% of species inventoried in a curated database. All  
1045 of the species used to build this database are sexual, and we initially hypothesised that both  
1046 higher duplication rates and gene losses in asexual as compared to sexual species could be

1047 reflected in the percentages of missing and duplicated BUSCO genes in the analyzed  
1048 asexual genomes. However, organisms that are highly heterozygous are prone to separate  
1049 assembly of homologous haplotypes. In such split genome assemblies, BUSCO genes will  
1050 falsely appear to be duplicated. To investigate whether split haplotype assemblies are of  
1051 concern in the analyzed asexual genomes, we deduced the level of haplotype splitting in the  
1052 assembled genomes by dividing the length of each assembly by the haploid genome size  
1053 estimated from the read data with genomescope (higher frequencies of separate haplotype  
1054 assemblies result in higher assembly length to haploid genome size ratios). We indeed  
1055 found that BUSCO genes appear to be duplicated in genome assemblies consisting of split  
1056 haplotypes, with the highest level of “artificial duplication” found in polyploid species of hybrid  
1057 origin (**Supplementary Figure 4a**).  
1058

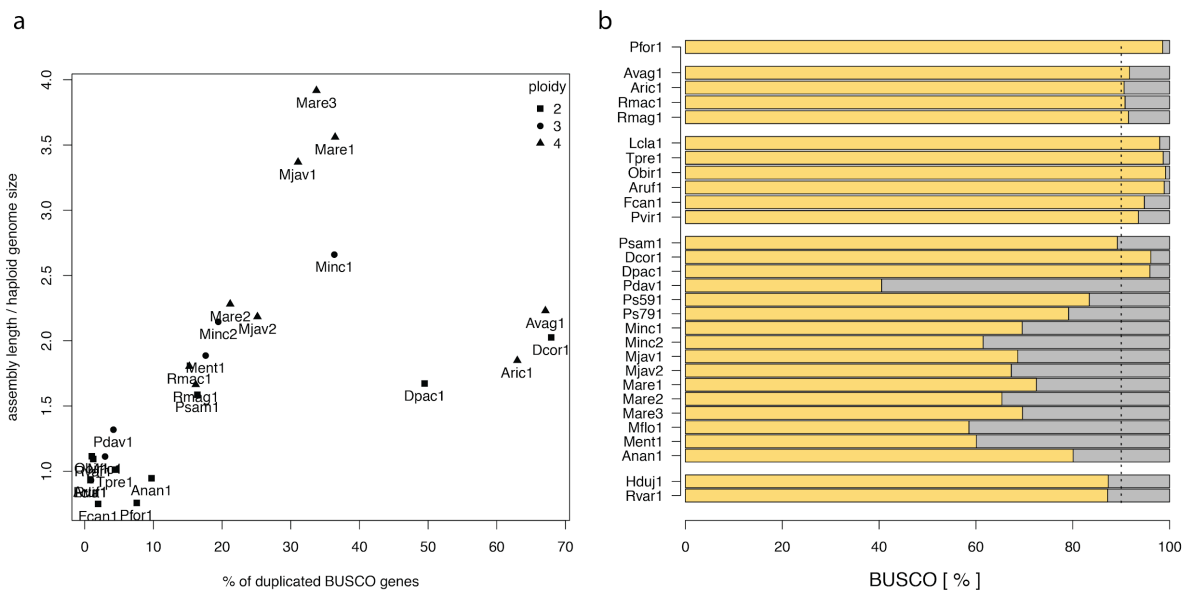

1059 **Supplementary Figure 4: Conserved single copy orthologs. a** | the fraction of duplicated  
1060 BUSCO genes is correlated to the ratio of assembly length to haploid genome size. **b** |  
1061 yellow bars show a proportion of BUSCO genes found in individual genomes. The dashed  
1062 line indicates the expected level.  
1063

1064  
1065 **Supplementary Table 1: Overview of analysed species.** This information was collected  
1066 directly from the cited literature.  
1067

1068 **Supplementary Table 2: Genomic features calculated from raw data.** We used unified  
1069 methods to estimate basic genomic properties directly from sequencing reads. Ploidy was  
1070 estimated using smudgeplot for all species but *A. vaga* (see section **Heterozygosity**  
1071 **structure in polyploids** for details). Genome size, heterozygosity and repeats were  
1072 estimated using GenomeScope. Repeats denote the fraction of the genome occurring in

1073 more than one copy. The classified repeats, TEs and other types of classified repeats, were  
1074 estimated using DnaPipeTE.

1075

1076 [https://github.com/KamilSJaron/genomic-features-of-asexual-](https://github.com/KamilSJaron/genomic-features-of-asexual-animals/blob/master/tables/genome_table_infered_from_reads.tsv)  
1077 [animals/blob/master/tables/genome\\_table\\_infered\\_from\\_reads.tsv](https://github.com/KamilSJaron/genomic-features-of-asexual-animals/blob/master/tables/genome_table_infered_from_reads.tsv)

1078

1079 **Supplementary Table 3: genome assemblies: size, number of scaffolds, N50, BUSCO,**  
1080 **number of annotated genes.** Statistics were calculated from the published genome  
1081 assemblies and genome annotations shared by authors. BUSCO genes were searched  
1082 using the metazoan database for all the non-nematode species. Nematodes are notoriously  
1083 known for the high turnover of genes and we therefore used nematode specific BUSCO  
1084 genes. The number of annotated genes were calculated as the number of lines in the  
1085 annotation with the tag “gene”

1086

1087 [https://github.com/KamilSJaron/genomic-features-of-asexual-](https://github.com/KamilSJaron/genomic-features-of-asexual-animals/blob/master/tables/assembly_table.tsv)  
1088 [animals/blob/master/tables/assembly\\_table.tsv](https://github.com/KamilSJaron/genomic-features-of-asexual-animals/blob/master/tables/assembly_table.tsv)
